# Supplementary material for: Total synthesis of agalloside, isolated from Aquilaria agallocha, by the 5-O-glycosylation of flavan
Source: Royal Society of Chemistry journal article supplement (doi:10.1039/c7ob01004d), 2017-01-01

## Supporting Information

### **Total Synthesis of Agalloside, Isolated from *Aquilaria agallocha*, by the 5-*O*-Glycosylation of Flavan**

Midori A. Arai,\* Yumi Yamaguchi, and Masami Ishibashi\*

Graduate School of Pharmaceutical Sciences, Chiba University, 1-8-1 Inohana, Chuo-ku,  
Chiba 260-8675, Japan

#### Contents

S1~S2 Effect of **1** on neural stem cells (MEB5) differentiation.

S3~S39 <sup>1</sup>H and <sup>13</sup>C NMR spectra.

**Neural stem cell differentiation assay.** MEB5 cells were dissociated using the NeuroCult Chemical Dissociation Kit and seeded at a density of  $2 \times 10^4$  cells/well on cover glass (MATSUNAMI GLASS) coated with poly-L-lysine and fibronectin/laminin. After incubation for 12 hrs, cells were washed with NeuroCult Basal Medium (Mouse) and treated with individual compounds in differentiation medium for 4 days.

**Immunofluorescence staining.** After incubation for 4 days, cells were fixed with 4% paraformaldehyde in PBS for 20 min at room temperature (r.t.) and washed with 1% BSA (Merck) in PBS two times. Cells were blocked in 10% BSA in 0.3% Triton X-100 (Wako) in PBS for 45 min at r.t. and incubated with primary antibodies (0.5 mg/mL anti- $\beta$ III-Tubulin; Neuronal Class III, Mouse-Mono, 1:400, R&D Systems<sup>TM</sup>; anti-GFAP, 1:400, VERITAS) for 12 hrs at 4 °C. After washing three times with 1% BSA in PBS (500  $\mu$ L/well), cells were incubated with secondary antibodies (Alexa Fluor<sup>®</sup> 488 goat anti-mouse IgG (H+L), 1:400, Life Technologies; Alexa Fluor<sup>®</sup> 555 goat anti-rabbit IgG (H+L), 1:200, Life Technologies) for 1 hr at r.t. in the dark. After washing three times with 1% BSA in PBS (500  $\mu$ L/well), cells were treated with 200  $\mu$ g/mL RNase (Nacalai Tesque) in PBS containing 1% BSA and 0.1% Triton X-100 for 1 hr at 37 °C in the dark. After washing three times with 500  $\mu$ L/well PBS, cells were incubated in 30  $\mu$ M TO-PRO<sup>®</sup>-3, 1% BSA, and 0.1% Triton X-100 in PBS for 10 min at r.t. in the dark. The cover glass on which the cells were attached was transferred onto slide glass and mounted with ProLong<sup>®</sup> Gold Antifade Reagent with DAPI (Invitrogen). Slide glasses were viewed and photographed with an LSM 700 (Carl Zeiss). Four pictures were taken per well, and the assays were carried out with three individual wells per condition.

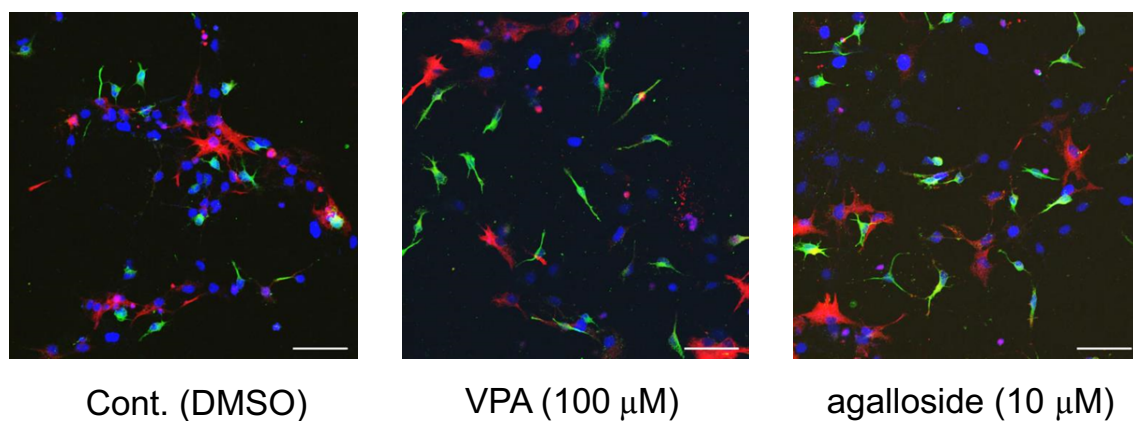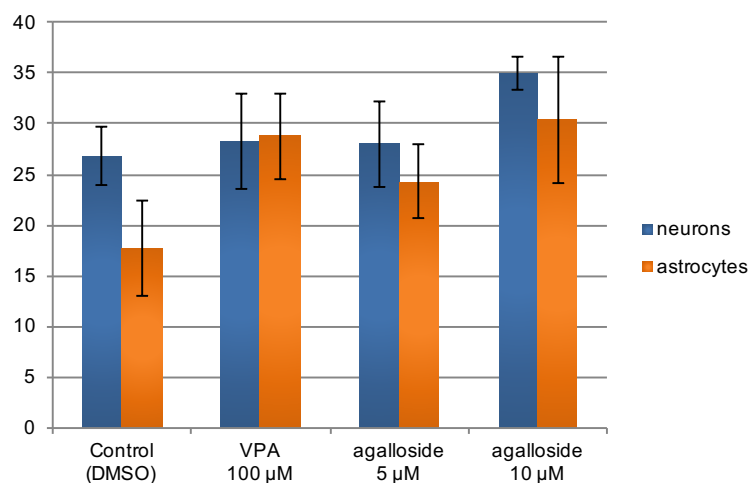

**SP-Figure 1.** Effect of **1** on neural stem cells (MEB5) differentiation. MEB5 cells were treated with DMSO, VPA (varproic acid, positive control, 100  $\mu$ M), or synthesized agalloside (**1**) (5 or 10  $\mu$ M) for 4 days. Then, cells were fixed and immunostained with Tuj-1 (green) for neurons, GFAP (red) for astrocytes, and TO-PRO-3 (blue) for nuclei.

Table 1 NMR data of synthetic and natural **1**.

| position | <sup>1</sup> H-NMR in DMSO- <i>d</i> <sub>6</sub> |                               | <sup>13</sup> C-NMR in DMSO- <i>d</i> <sub>6</sub> |                               |
|----------|---------------------------------------------------|-------------------------------|----------------------------------------------------|-------------------------------|
|          | synthetic <b>1</b><br>(600 MHz)                   | natural <b>1</b><br>(400 MHz) | synthetic <b>1</b><br>(150 MHz)                    | natural <b>1</b><br>(100 MHz) |
| 2        |                                                   |                               | 161.0                                              | 160.9                         |
| 3        | 6.80 (s)                                          | 6.80 (s)                      | 106.5                                              | 106.5                         |
| 4        |                                                   |                               | 177.0                                              | 176.9                         |
| 5        |                                                   |                               | 158.2                                              | 158.2                         |
| 6        | 6.87 (s)                                          | 6.87 (d, 2.0)                 | 102.8                                              | 102.9                         |
| 7        |                                                   |                               | 163.8                                              | 163.7                         |
| 8        | 7.06 (s)                                          | 7.06 (d, 2.0)                 | 96.6                                               | 96.7                          |
| 9        |                                                   |                               | 158.6                                              | 158.5                         |
| 10       |                                                   |                               | 109.2                                              | 109.2                         |
| 1'       |                                                   |                               | 122.8                                              | 122.8                         |
| 2'       | 8.04 (d, 8.7)                                     | 8.04 (d, 9.0)                 | 128.2                                              | 128.1                         |
| 3'       | 7.11 (d, 8.7)                                     | 7.09 (d, 9.0)                 | 114.7                                              | 114.6                         |
| 4'       |                                                   |                               | 162.2                                              | 162.1                         |
| 5'       | 7.11 (d, 8.7)                                     | 7.09 (d, 9.0)                 | 114.7                                              | 114.6                         |
| 6'       | 8.04 (d, 8.7)                                     | 8.04 (d, 9.0)                 | 128.2                                              | 128.1                         |
| OMe-7    | 3.89 (s)                                          | 3.89 (s)                      | 56.2                                               | 56.2                          |
| OMe-4'   | 3.85 (s)                                          | 3.84 (s)                      | 55.6                                               | 55.6                          |
| 1''      | 4.79 (d, 7.8)                                     | 4.78 (d, 7.6)                 | 103.5                                              | 103.7                         |
| 2''      | 2.98 (m)                                          | 2.98 (m)                      | 73.3                                               | 73.4                          |
| 3''      | 3.09 (t, 8.4)                                     | 3.09 (t, 8.6)                 | 76.4                                               | 76.6                          |
| 4''      |                                                   | 3.28 (t, 8.4)                 | 69.5                                               | 69.5                          |
| 5''      |                                                   | 3.31 (m)                      | 75.5                                               | 75.6                          |
| 6''      | 3.64 (m)                                          | 3.65 (dd, 10.7, 4.6)          | 68.7                                               | 68.9                          |
|          | 3.97 (d, 10.8)                                    | 3.97 (d, 10.7)                |                                                    |                               |
| 1'''     | 4.18 (d, 7.8)                                     | 4.18 (d, 7.6)                 | 104.2                                              | 104.1                         |
| 2'''     |                                                   | 3.36 (m)                      | 73.4                                               | 73.5                          |
| 3'''     | 3.56 (t, 8.1)                                     | 3.56 (t, 8.0)                 | 75.9                                               | 75.9                          |
| 4'''     |                                                   | 3.24 (m)                      | 69.6                                               | 69.7                          |
| 5'''     |                                                   | 3.01 (m)                      | 65.7                                               | 65.7                          |
|          | 3.68 (m)                                          | 3.68 (m)                      |                                                    |                               |



\\Kk-optiplex3020\nmr\ECP400\ŽRCE\total\_synthesis\1H\5-21.als

single\_pulse

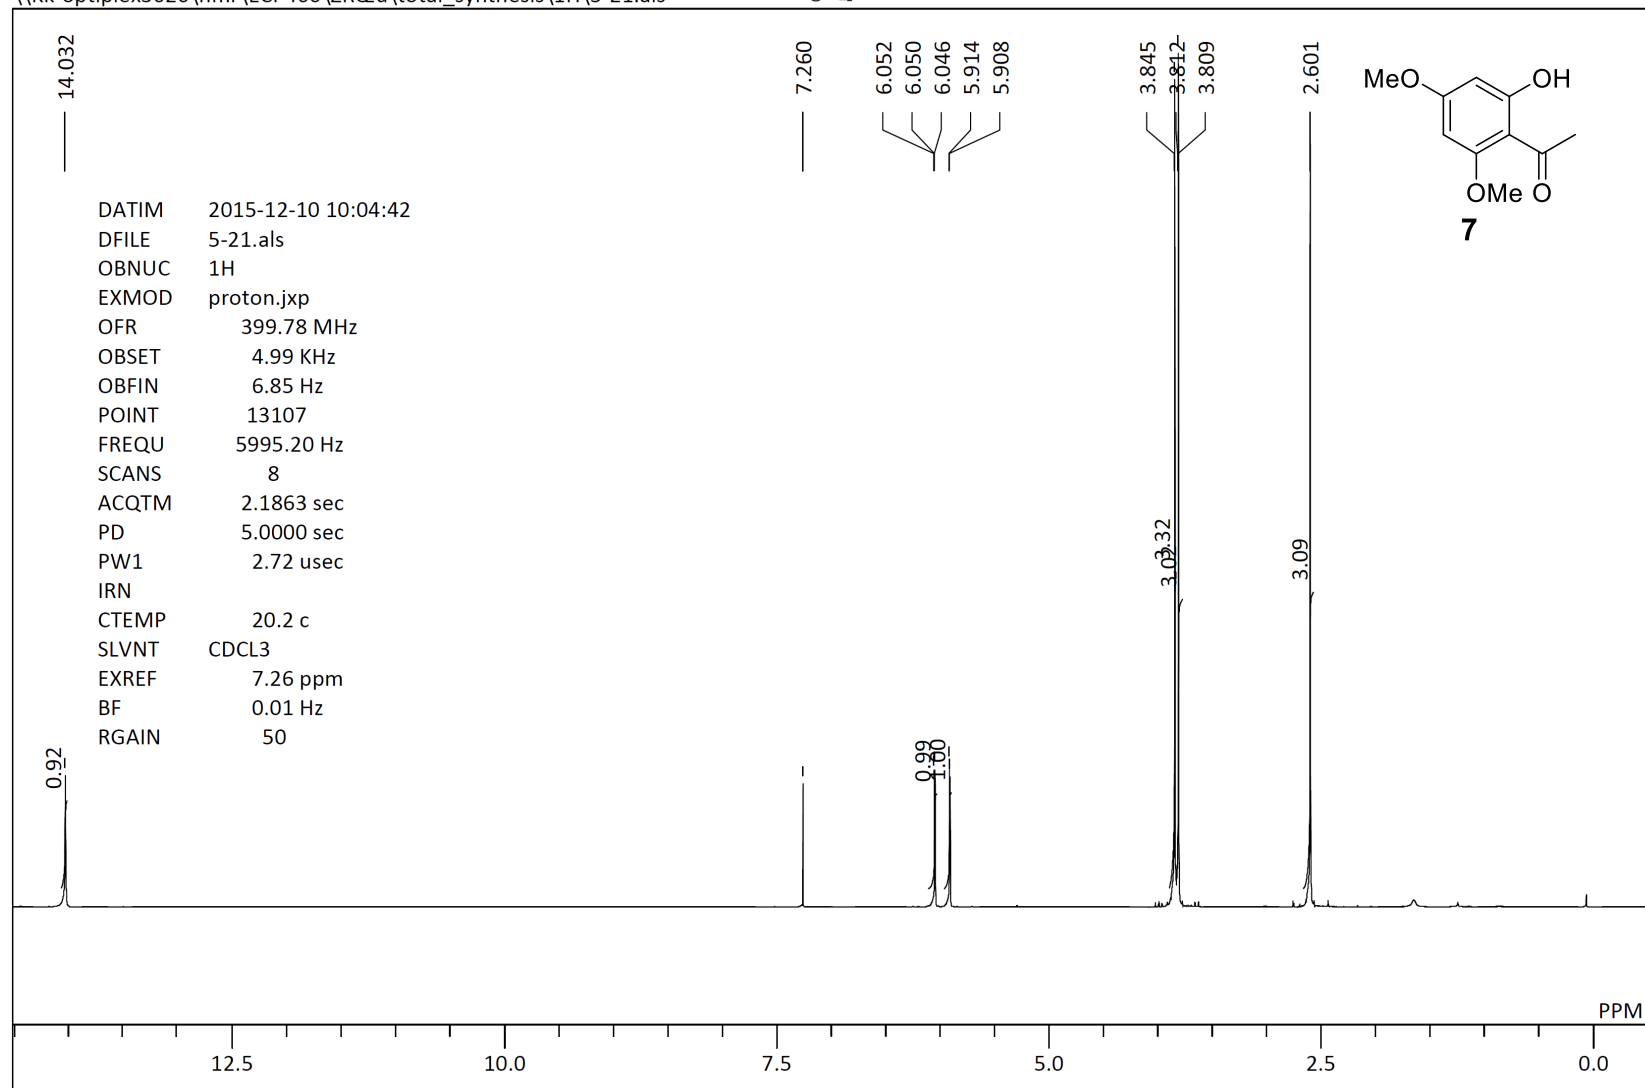

\\Kk-optiplex3020\nmr\ECP400\ZRCU\total\_synthesis\10\kky-1-46-A-chloroform-140919-bcm  
kky-1-46-A-chloroform-140919-bcm

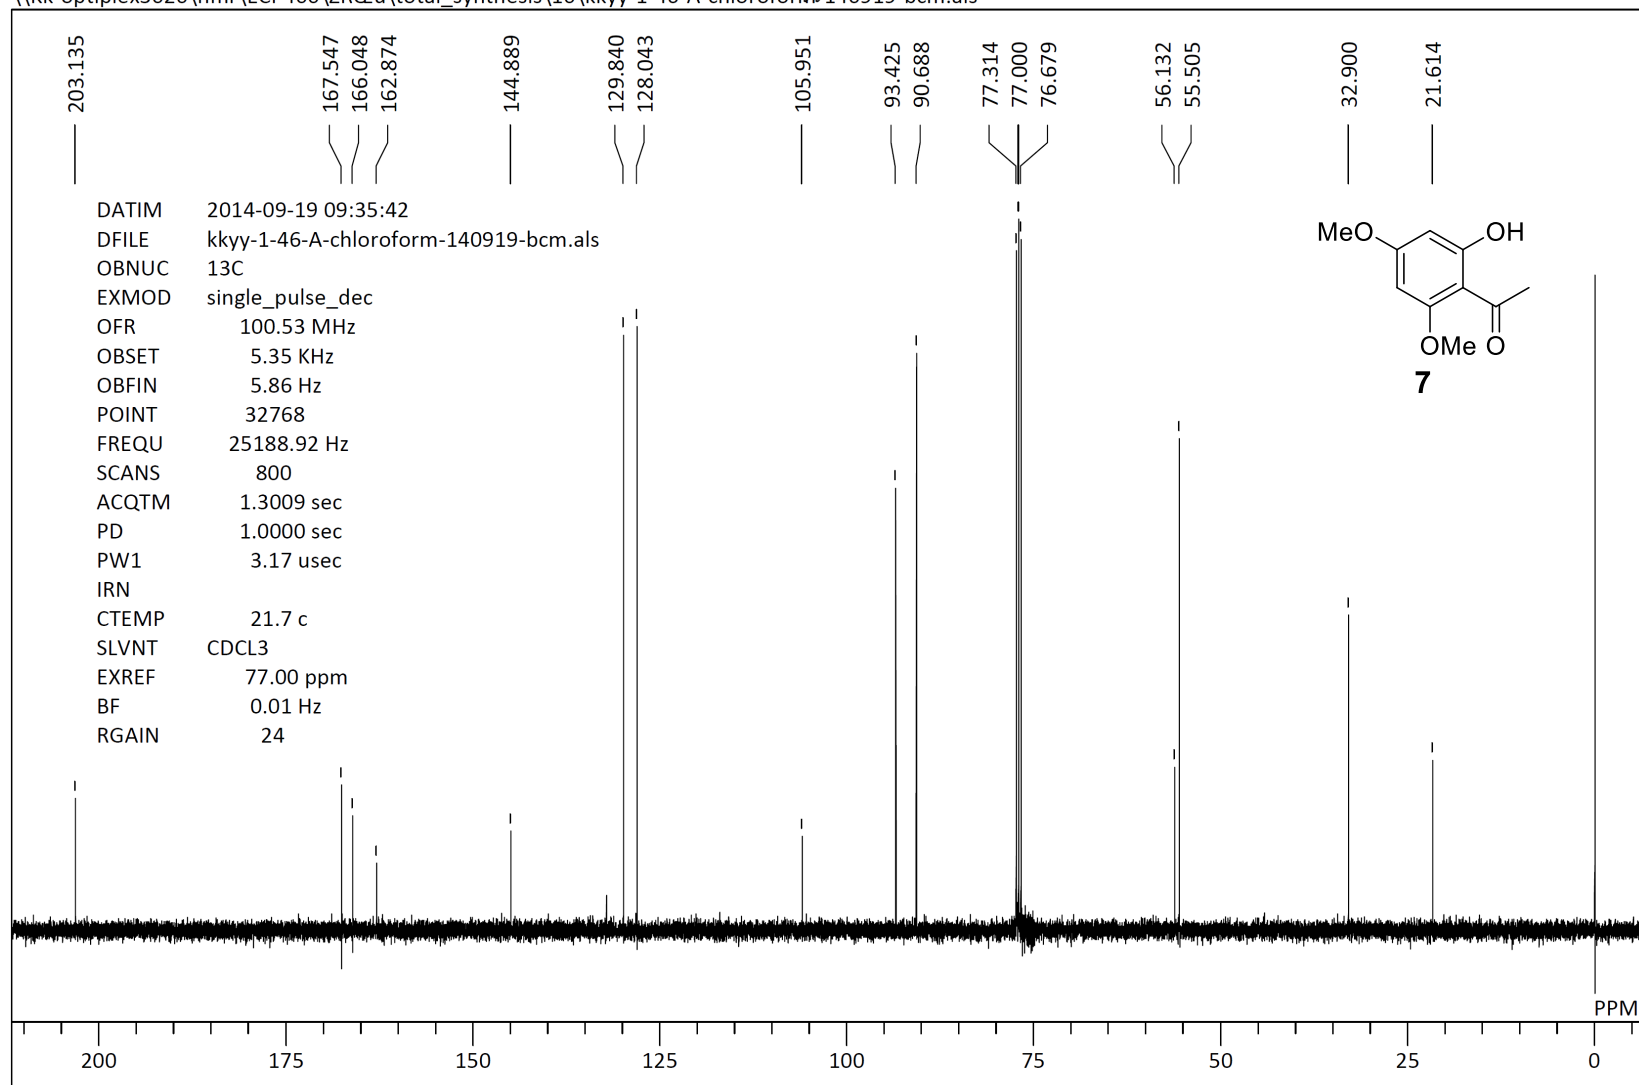

Z:\NMR\ECP400\ZRCU\total\_synthesis\11\kky-1-45-B-chloroform-140916-non.als kky-1-45-B-chloroform-140916-non

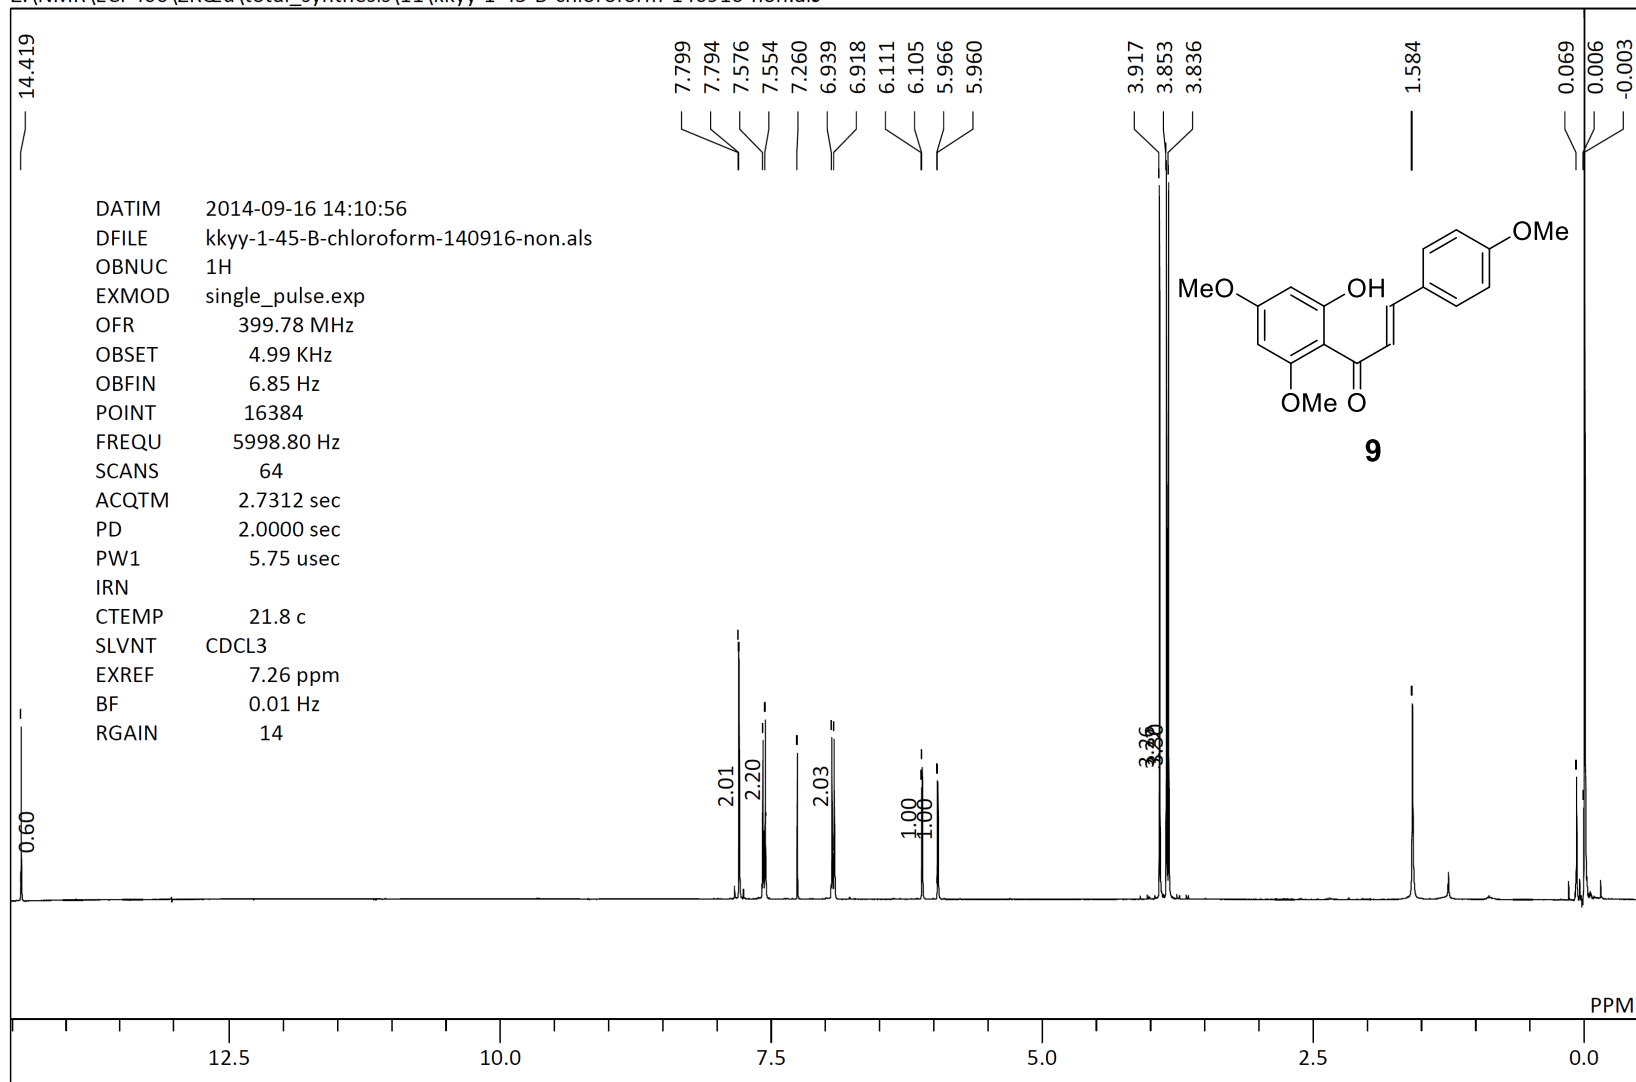

Z:\NMR\ECP400\ZRCU\1-series\13C-als\kky-1-45-B-chloroform-140916-bcm.als kky-1-45-B-chloroform-140916-bcm

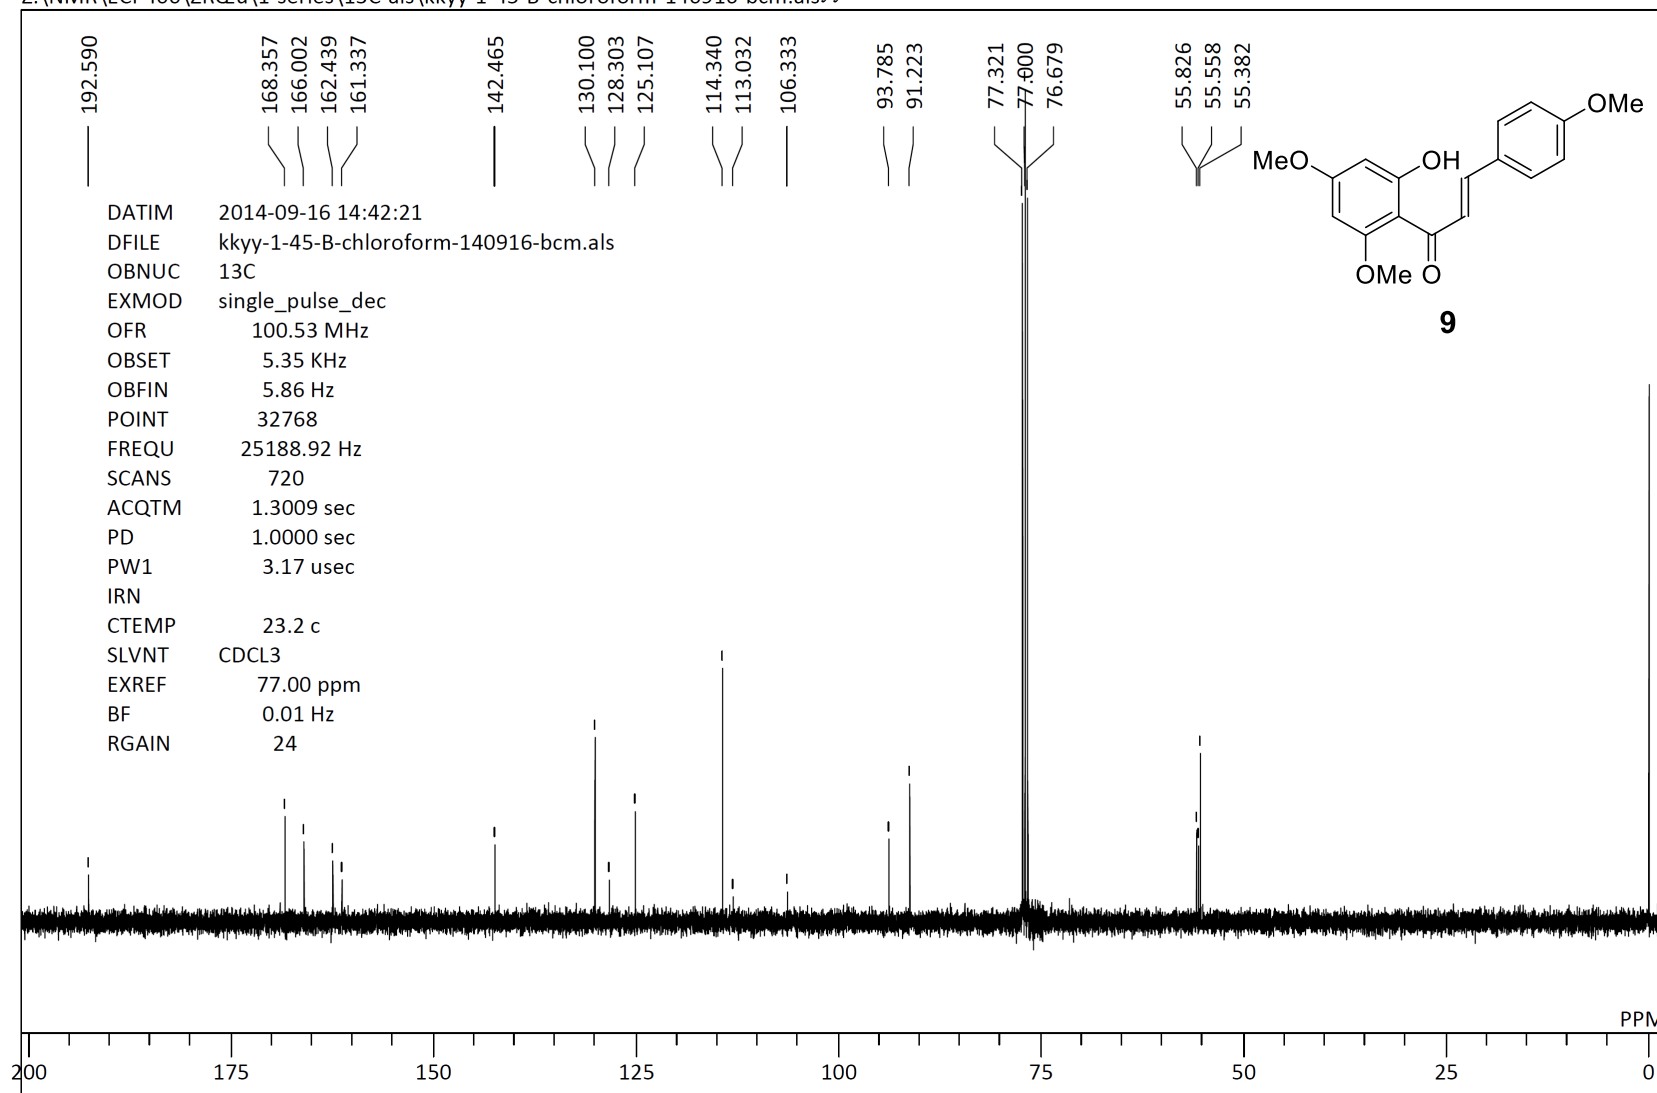

Z:\NMR\ECP400\ZRCU\total\_synthesis\12\kky-5-43-Fr10-chloroform-160623-non\_proton-1-1.als

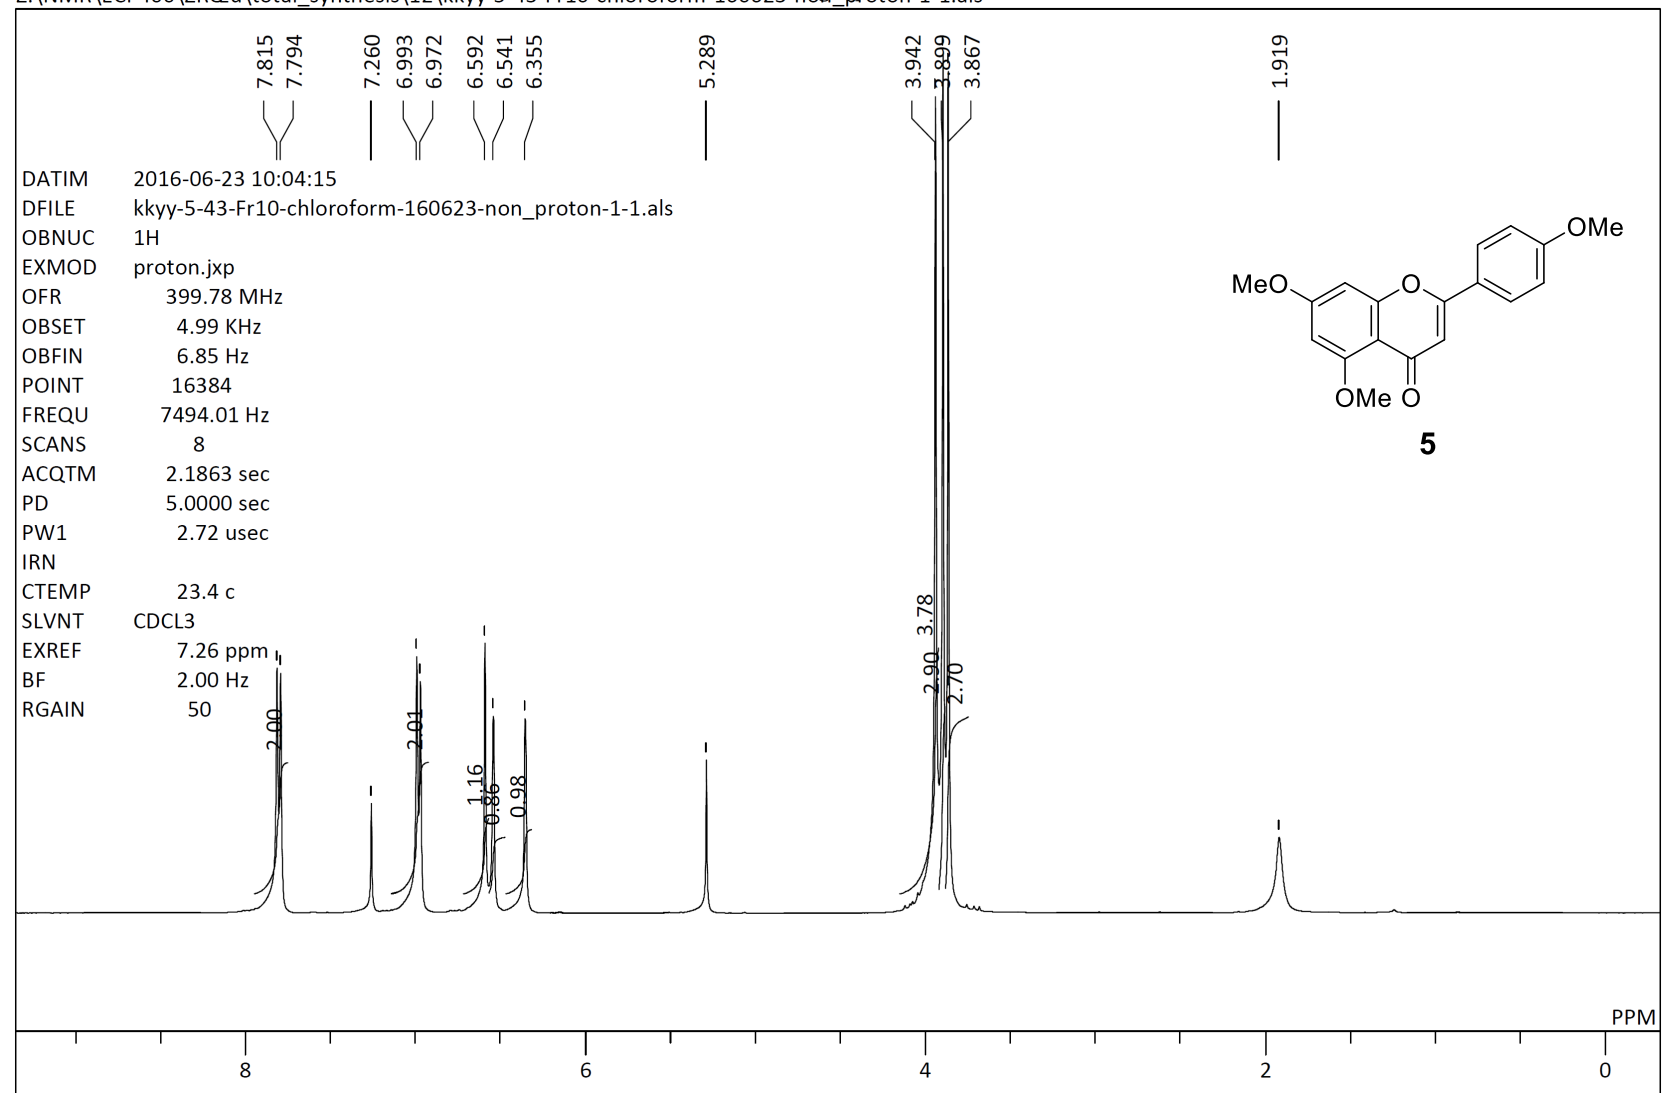

\\Kk-optiplex3020\nmr\ECP400\ZRCU\total\_synthesis\12\kky-5-43-chloroform-160623\_carbon-1-1.als

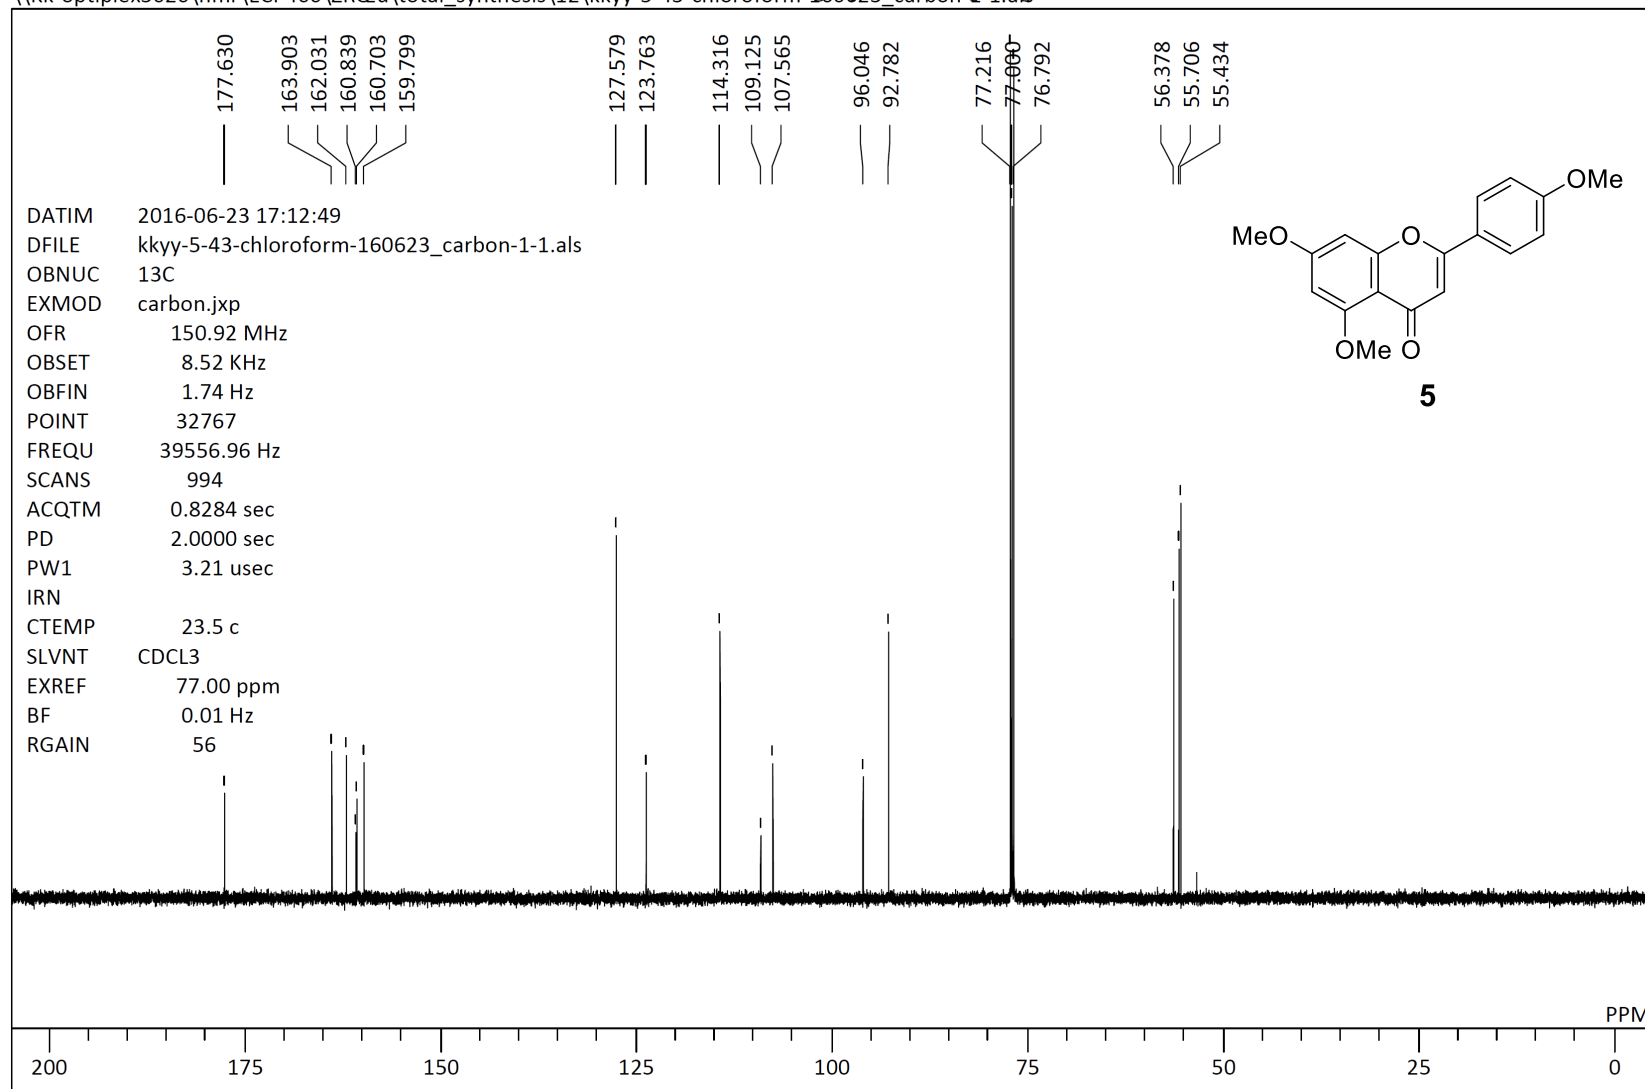

Z:\NMR\ECP400\ZRCU\total\_synthesis\13\kky-1-64-HPLC-chloroform-150212-non.als kky-1-64-HPLC-chloroform-150212-non

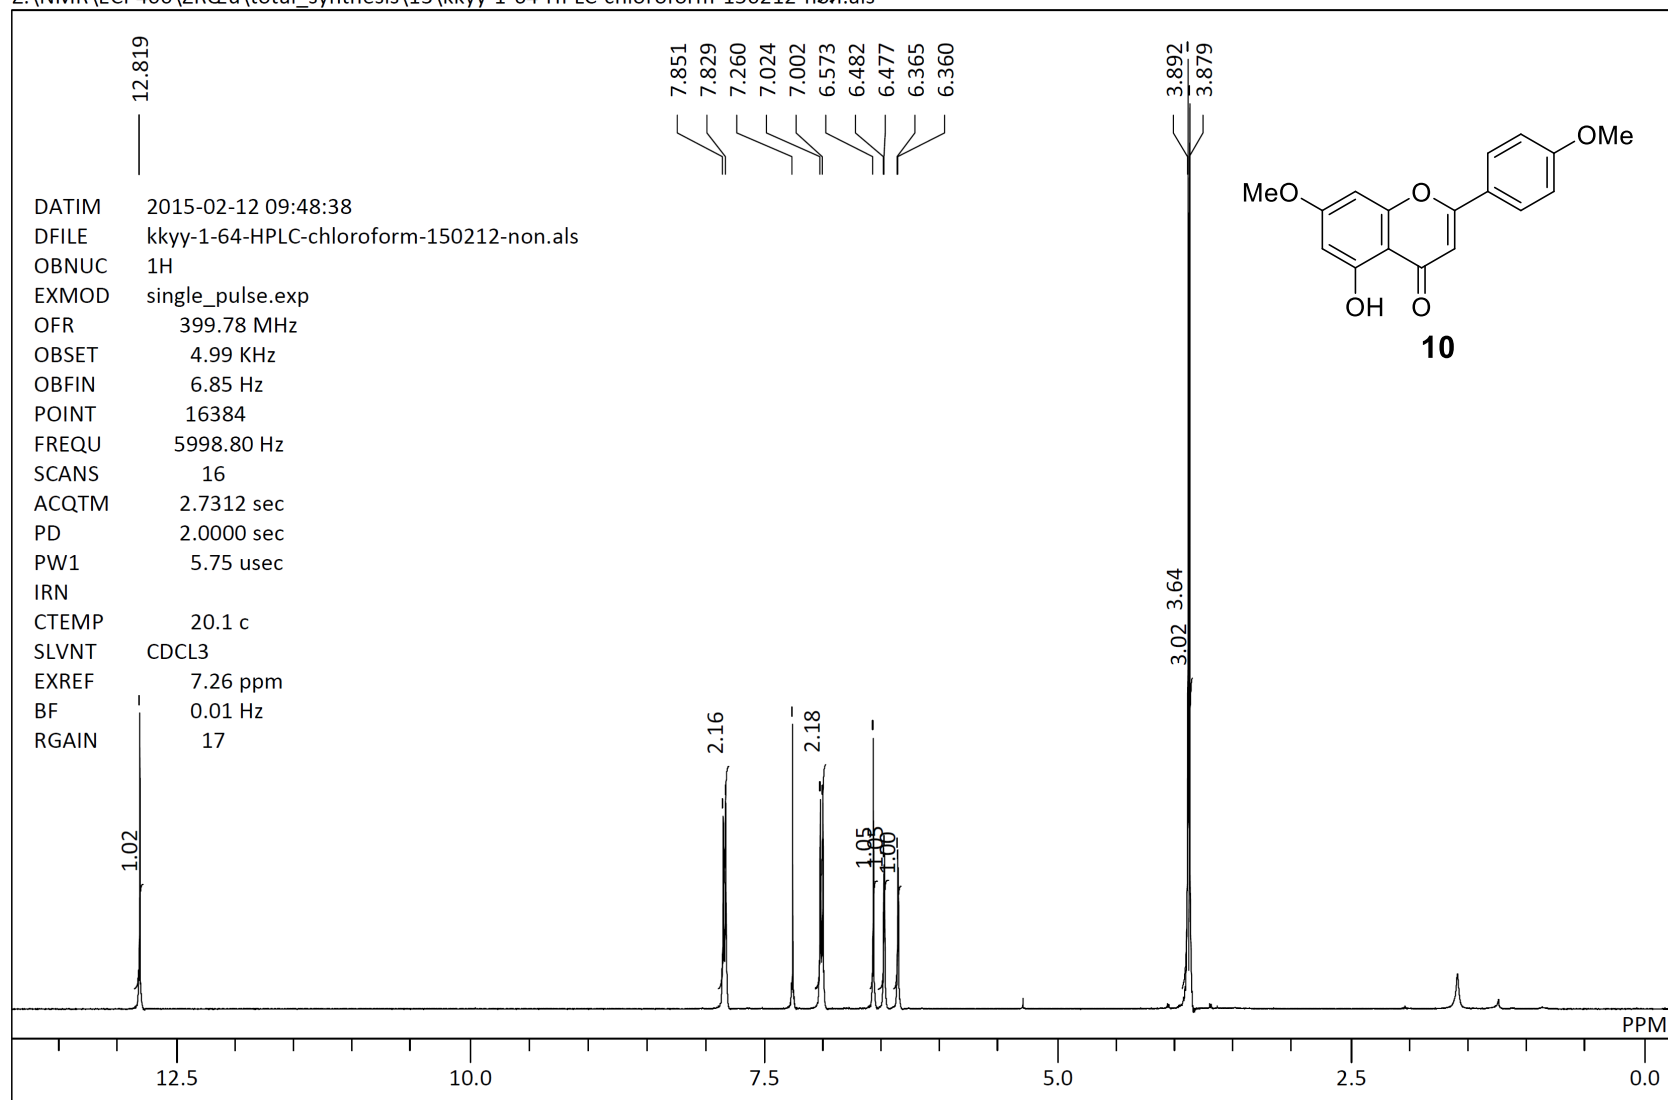

Z:\NMR\ECA600\ŽRĖŭ\kky-1-53-A\_Carbon-1-1.als

single pulse decoupled gated NOE

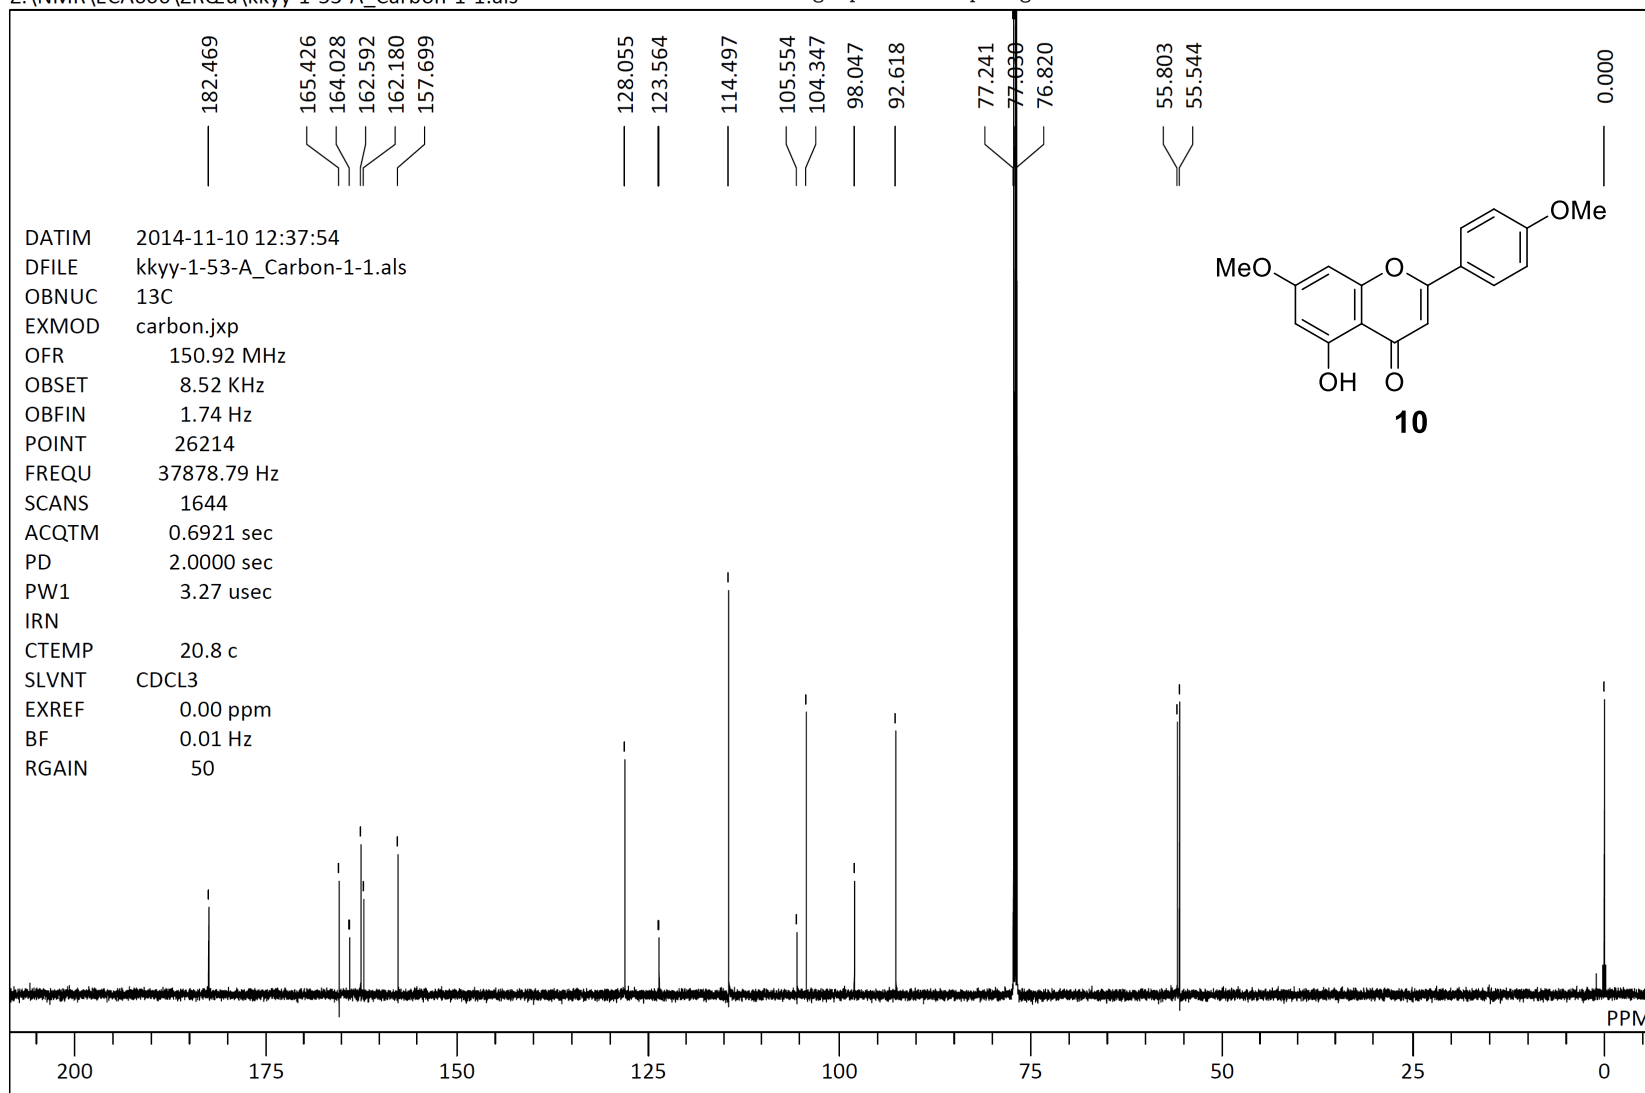



\\Kk-optiplex3020\nmr\ECP400\ZRC\total\_synthesis\15\kky-5-59-B-chloroform-160812\_proton-1-1.als

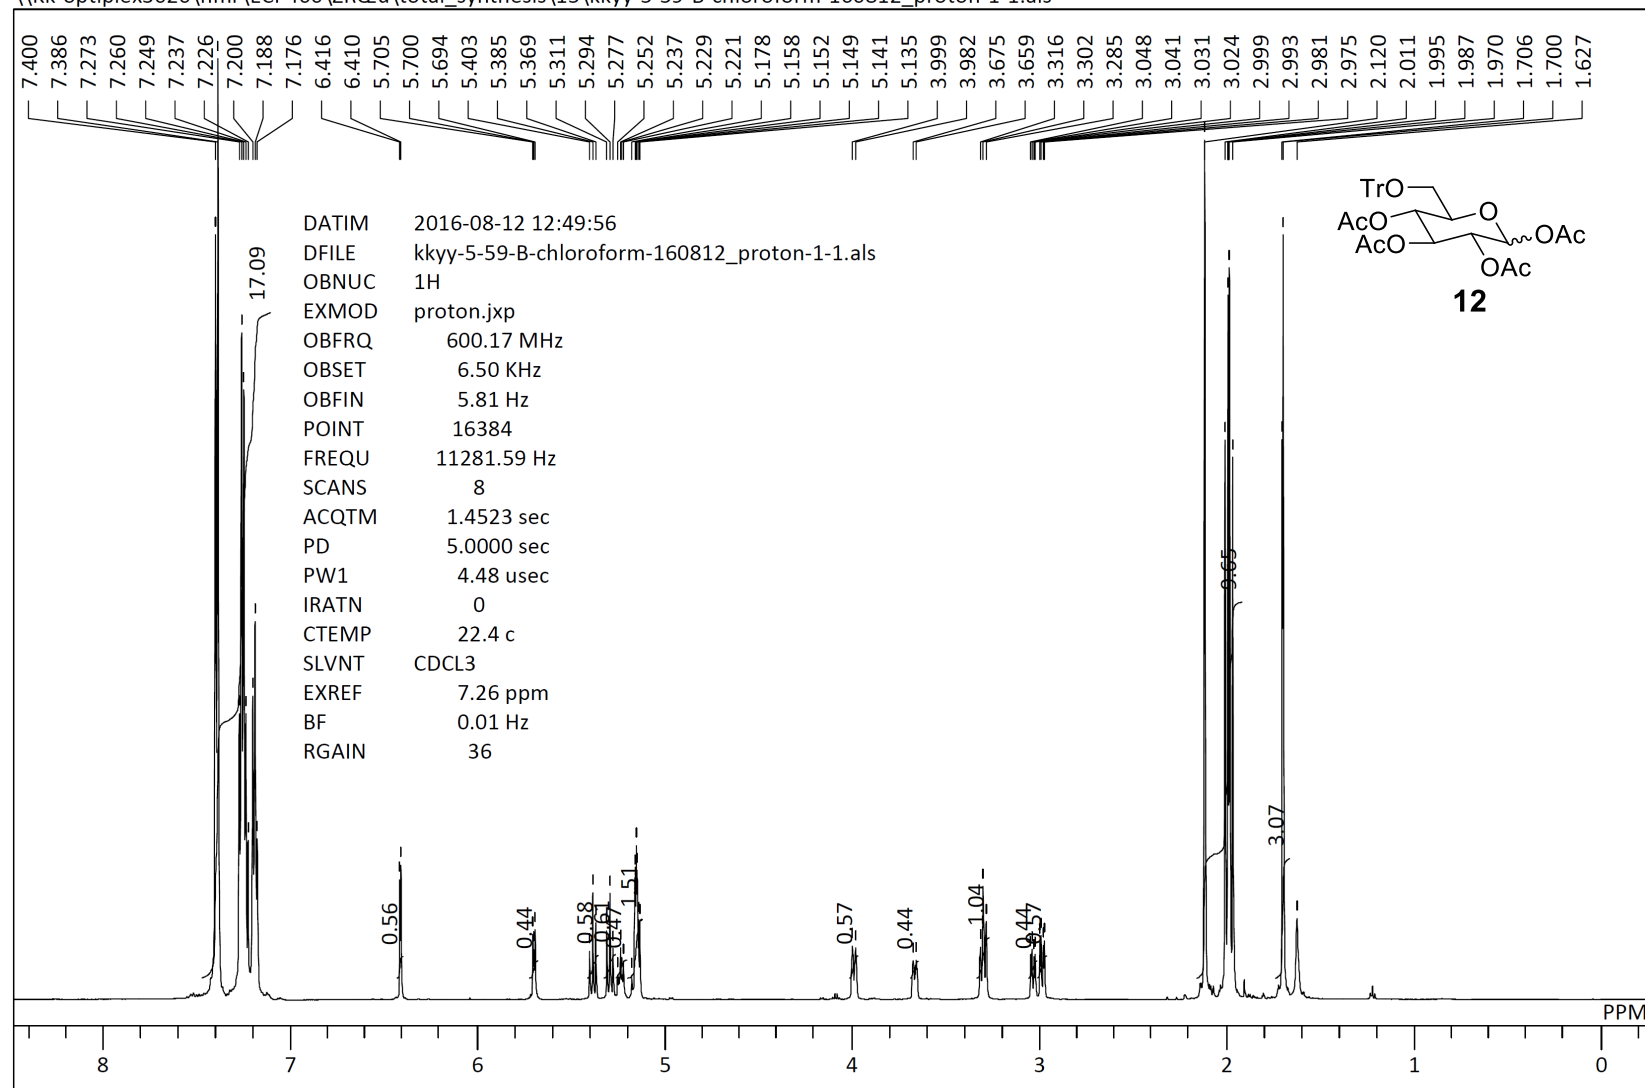

Z:\NMR\ECP400\ZRC\total\_synthesis\15\kky-5-59-B-chloroform-160812\_carbon-1-1.als

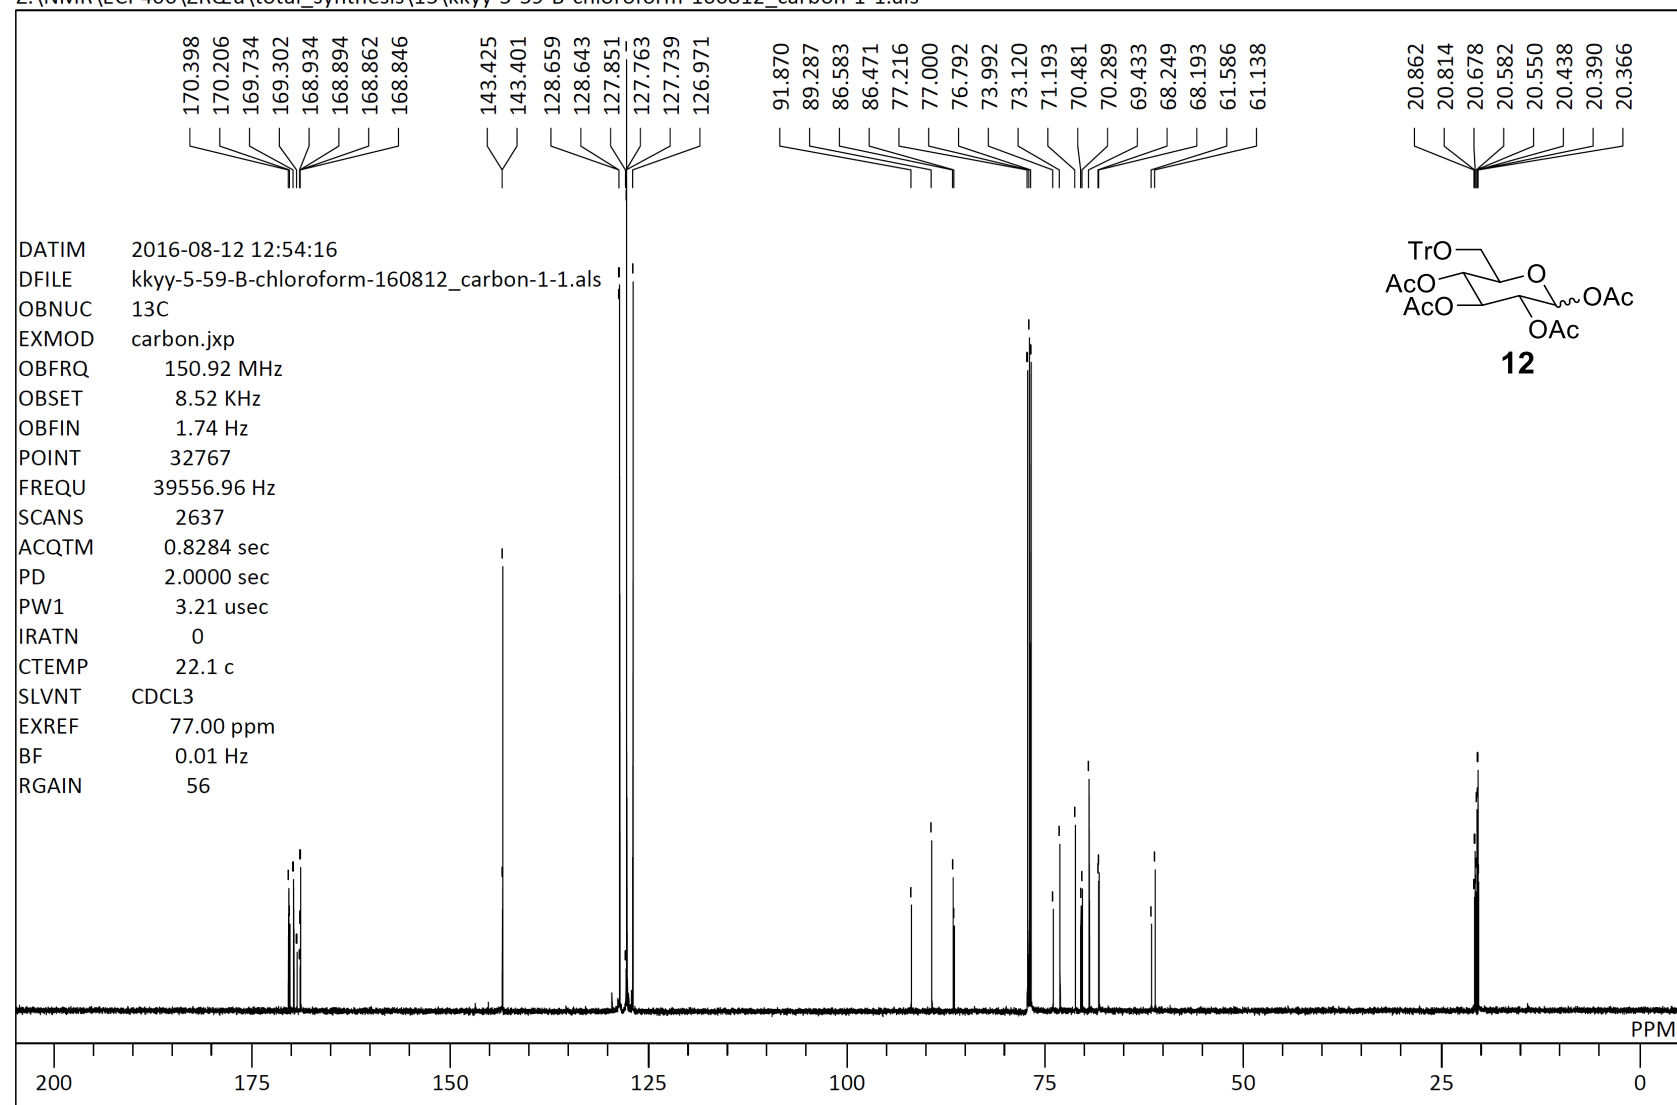

Z:\NMR\ECP400\ZRCU\total\_synthesis\16\kky-5-56-C-chloroform-160728-non\_proton-1-1.als

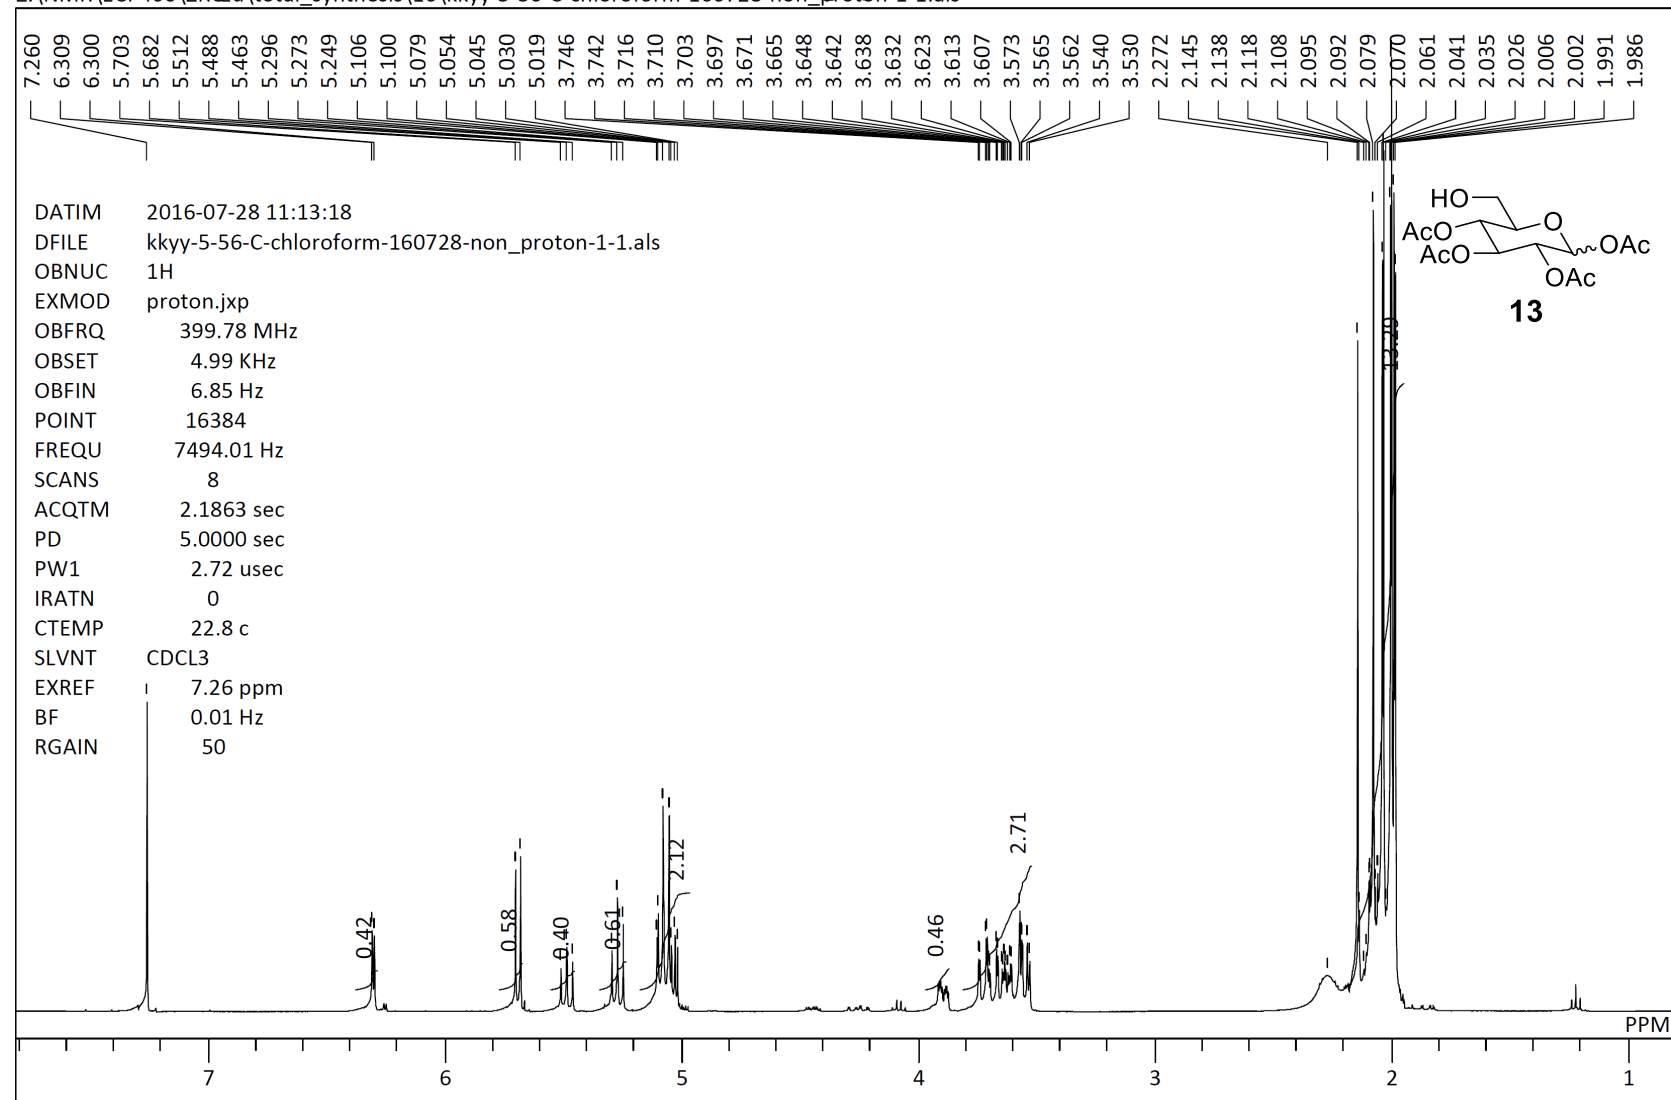

Z:\NMR\ECP400\ŽRĚŮ\total\_synthesis\16\kky-5-66-B-chloroform-170121\_carbon-1-1.als

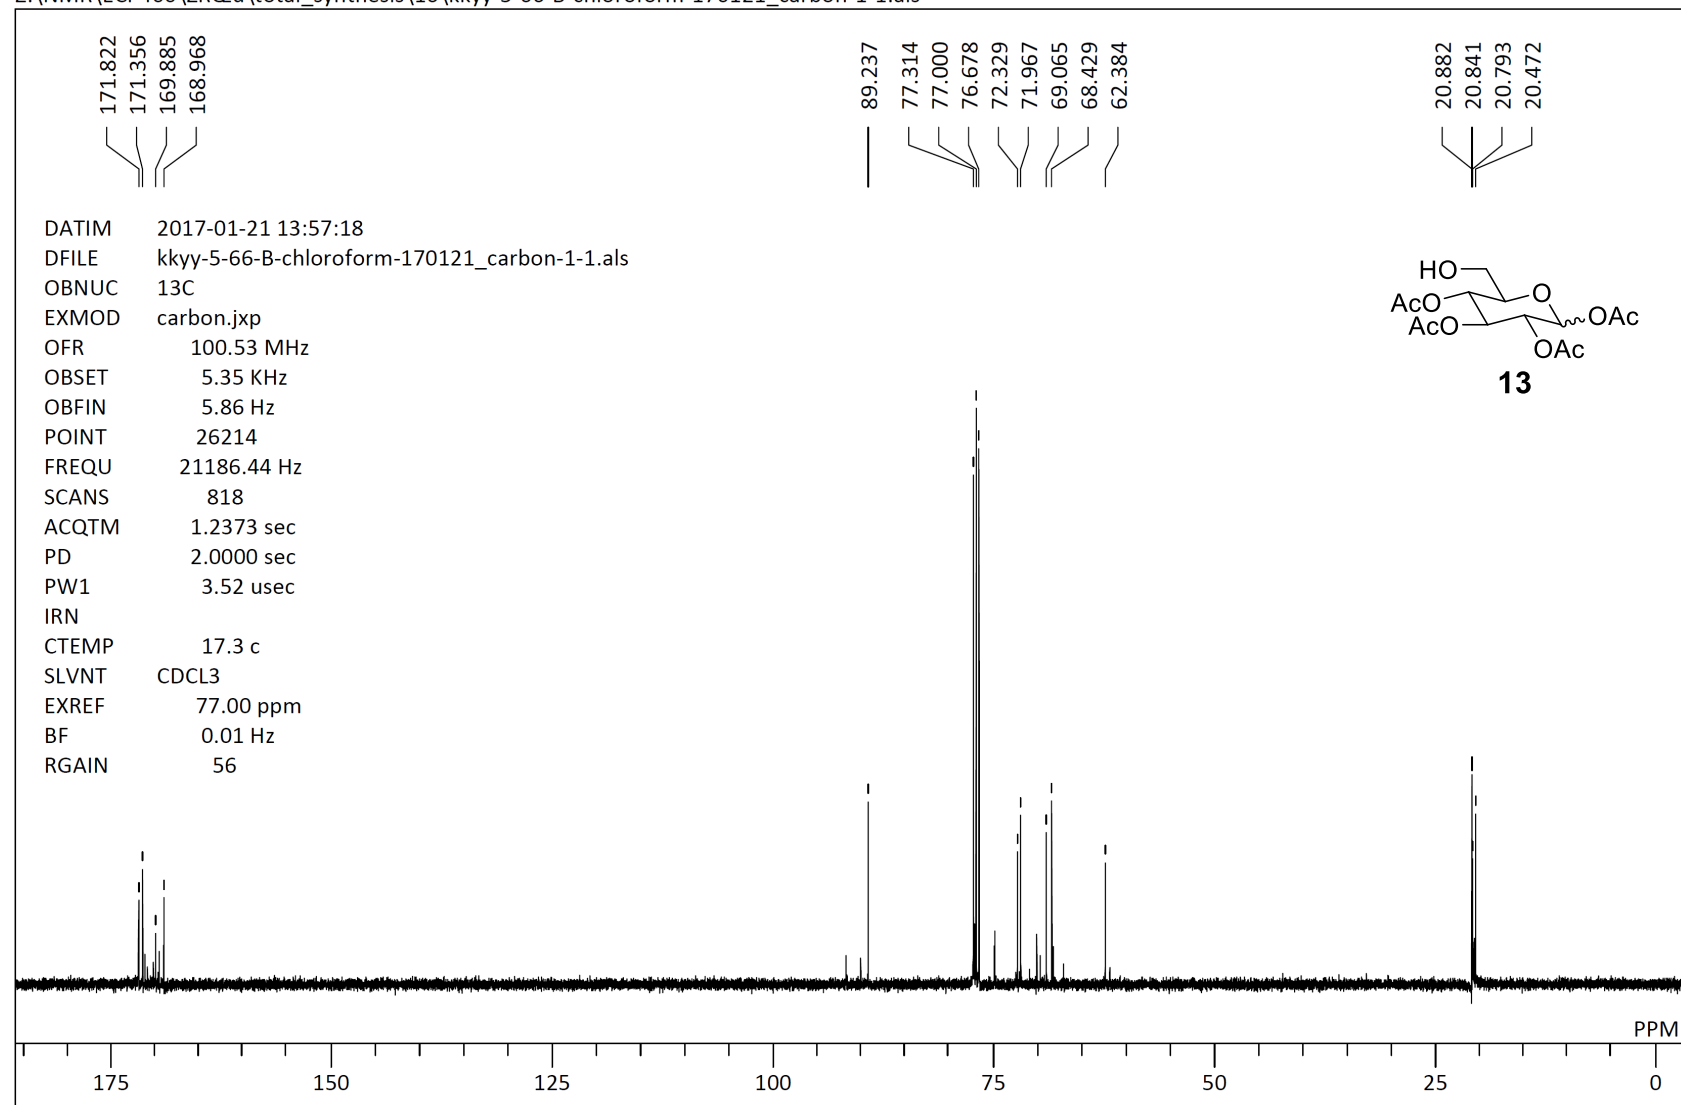

Z:\NMR\ECP400\ŽRĚŮ\5-series\1H\kky-5-60-B-chloroform-160812-non\_proton-1-1.als

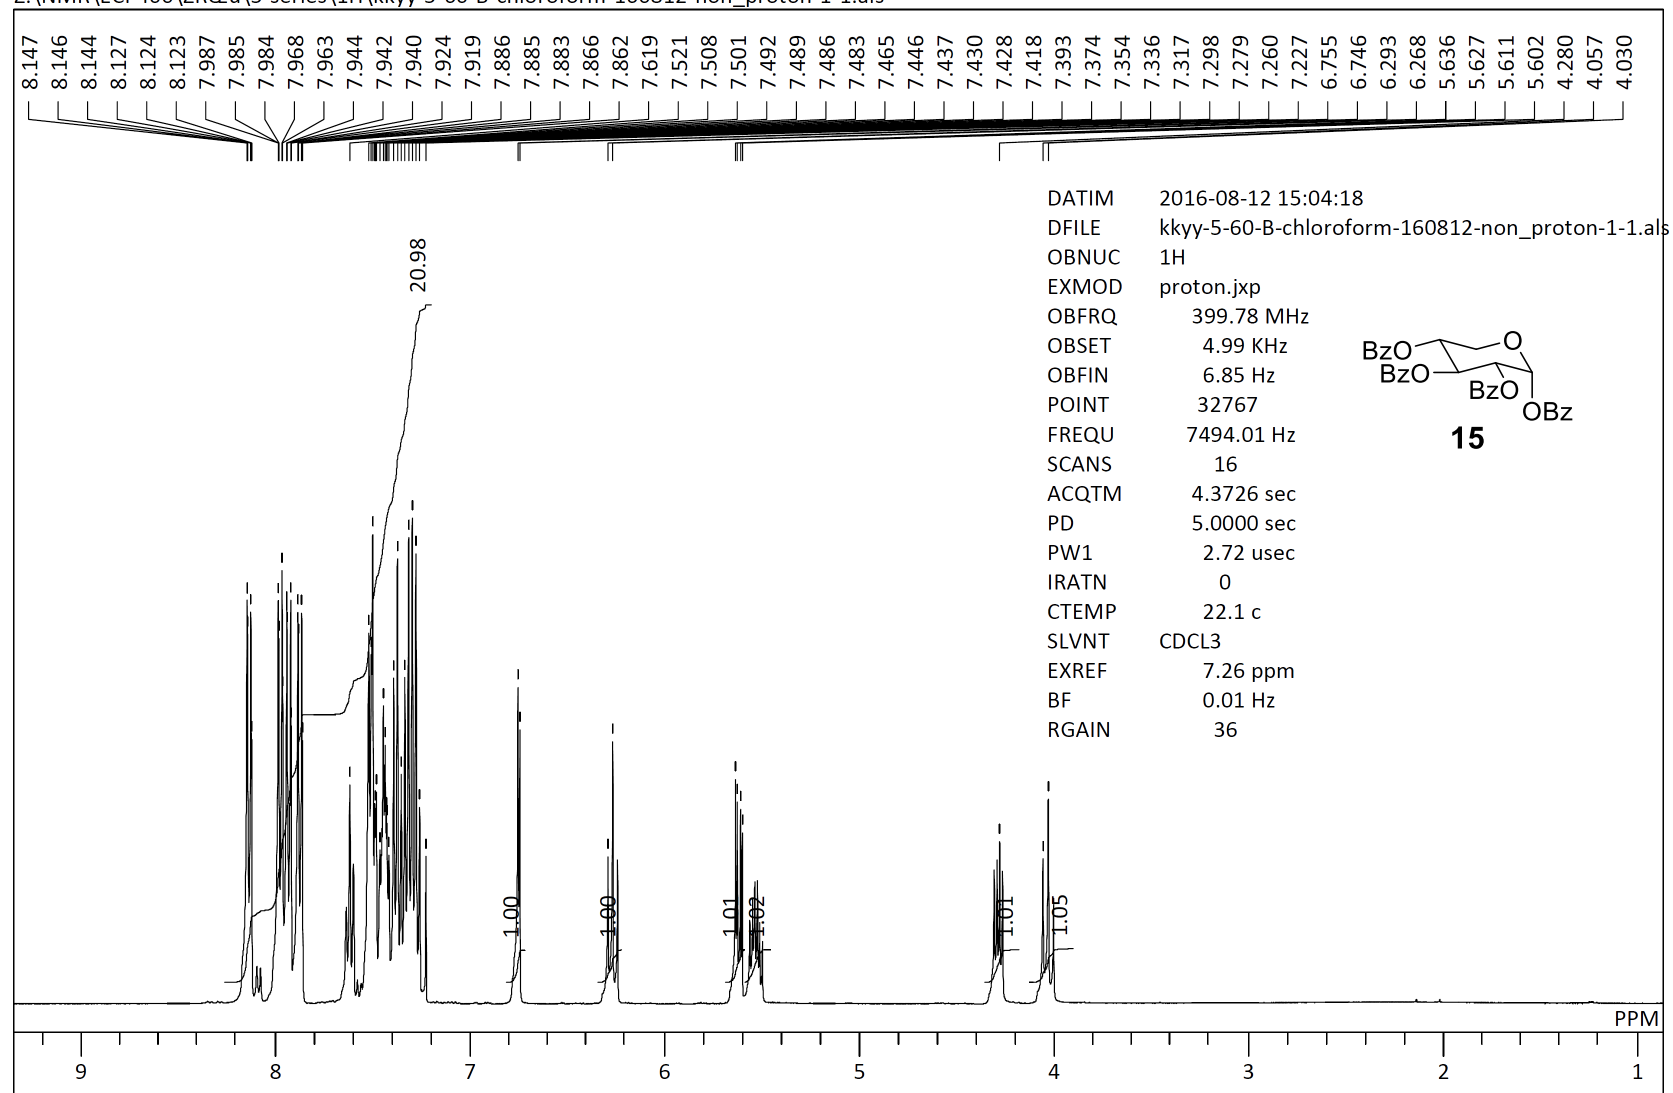

Z:\NMR\ECP400\ŽRĖŪ\total\_synthesis\18\kky-2-2-A-chloroform-140917-bcm.als

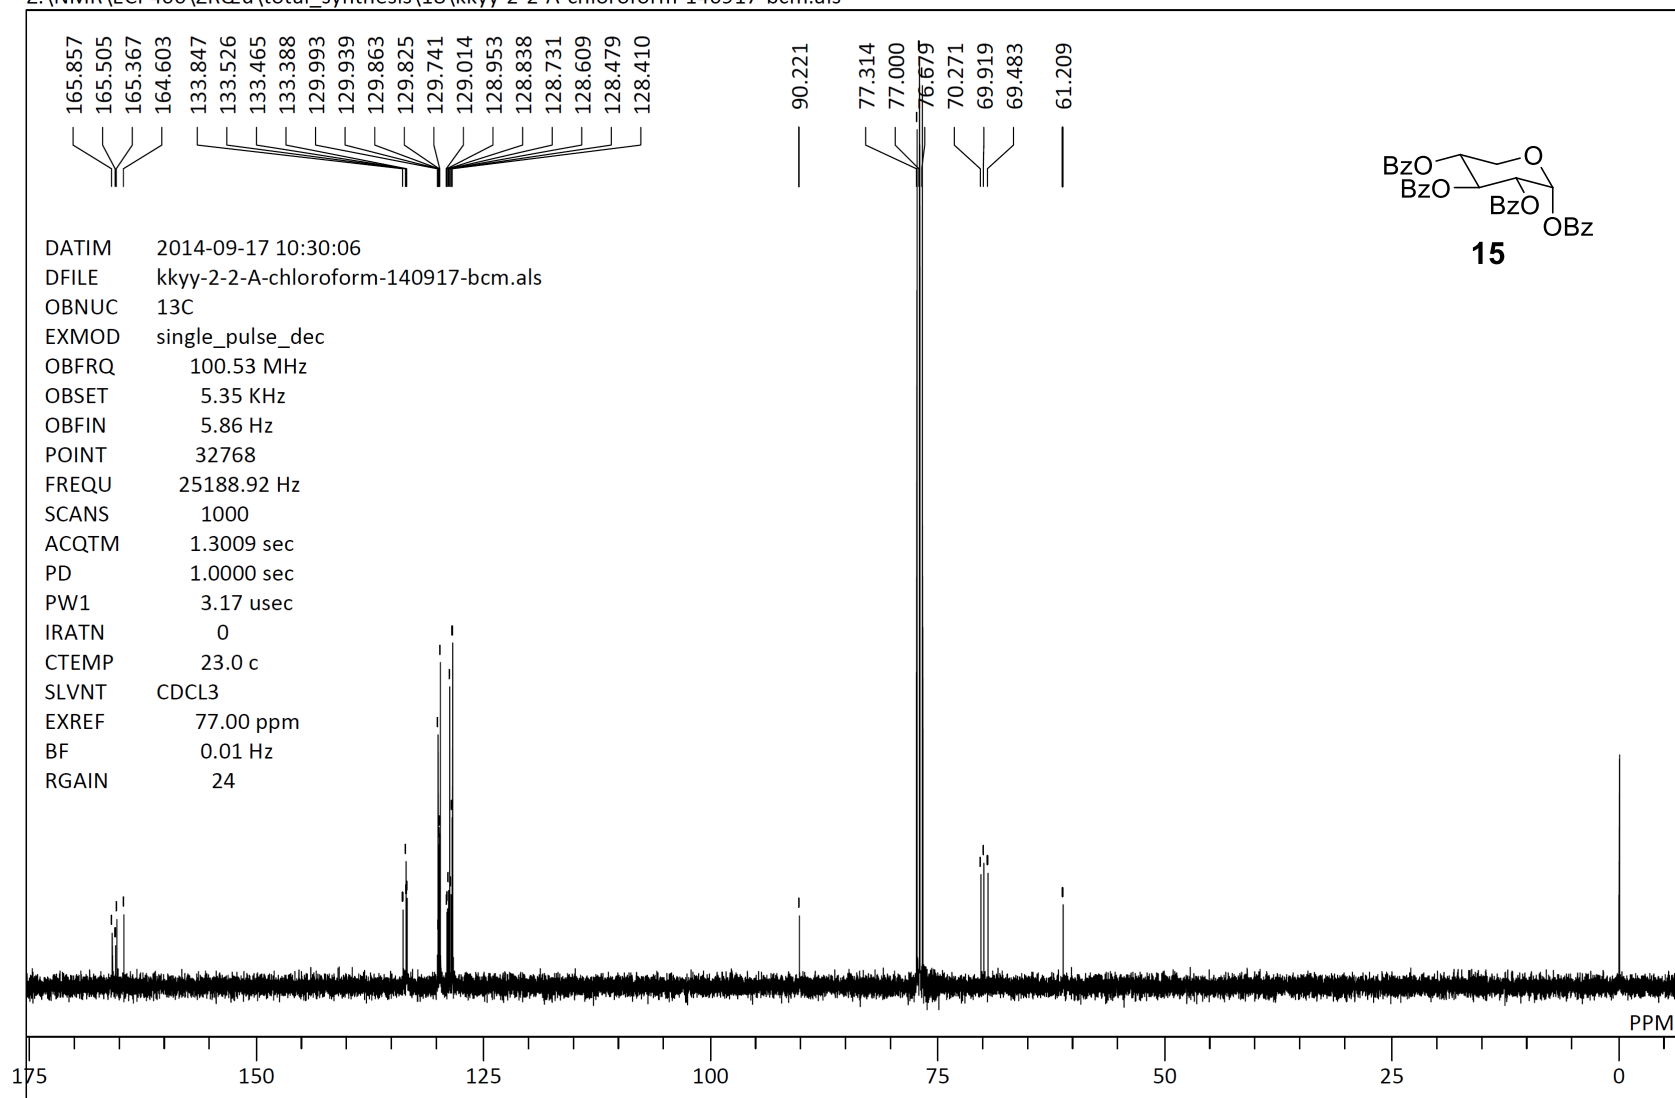

Z:\NMR\ECP400\ŽRCE\total\_synthesis\20\kky-2-24-C-chloroform-170123\_proton-1-1.als

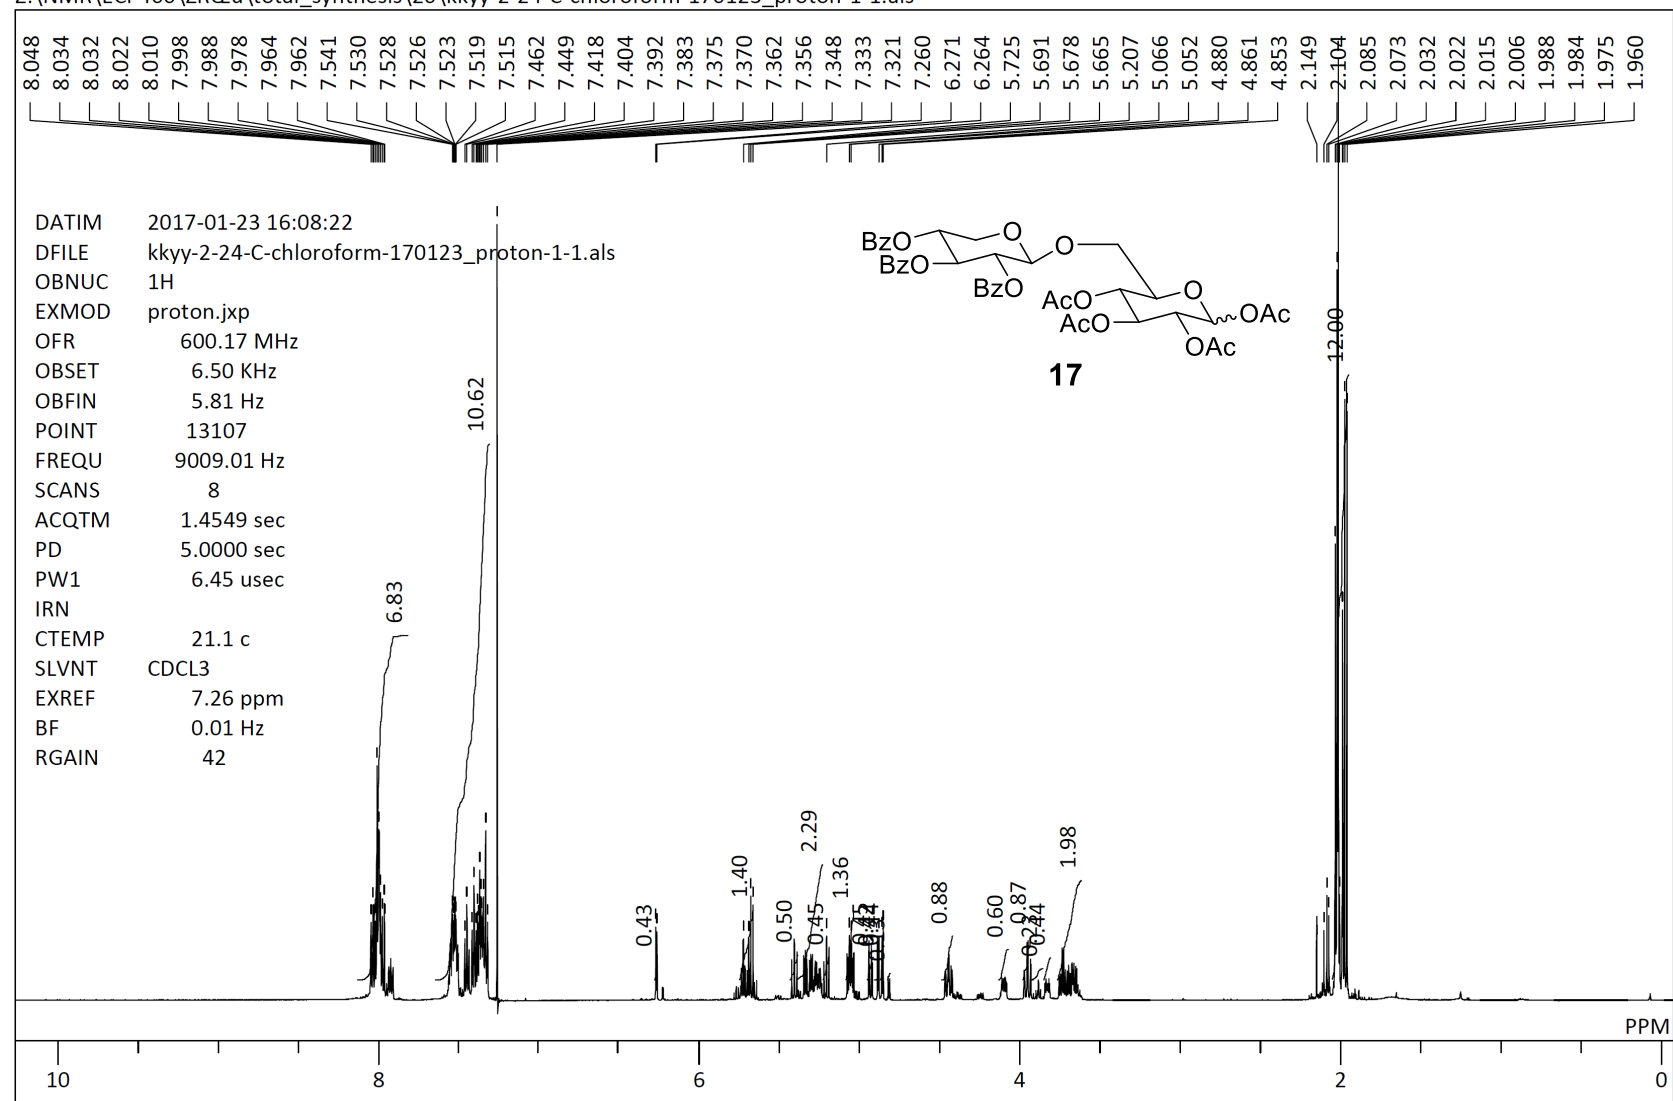

Z:\NMR\ECP400\ZRCU\total\_synthesis\20\KKYY-2-75-chloroform-150325-non\_Carbon-1-1.als

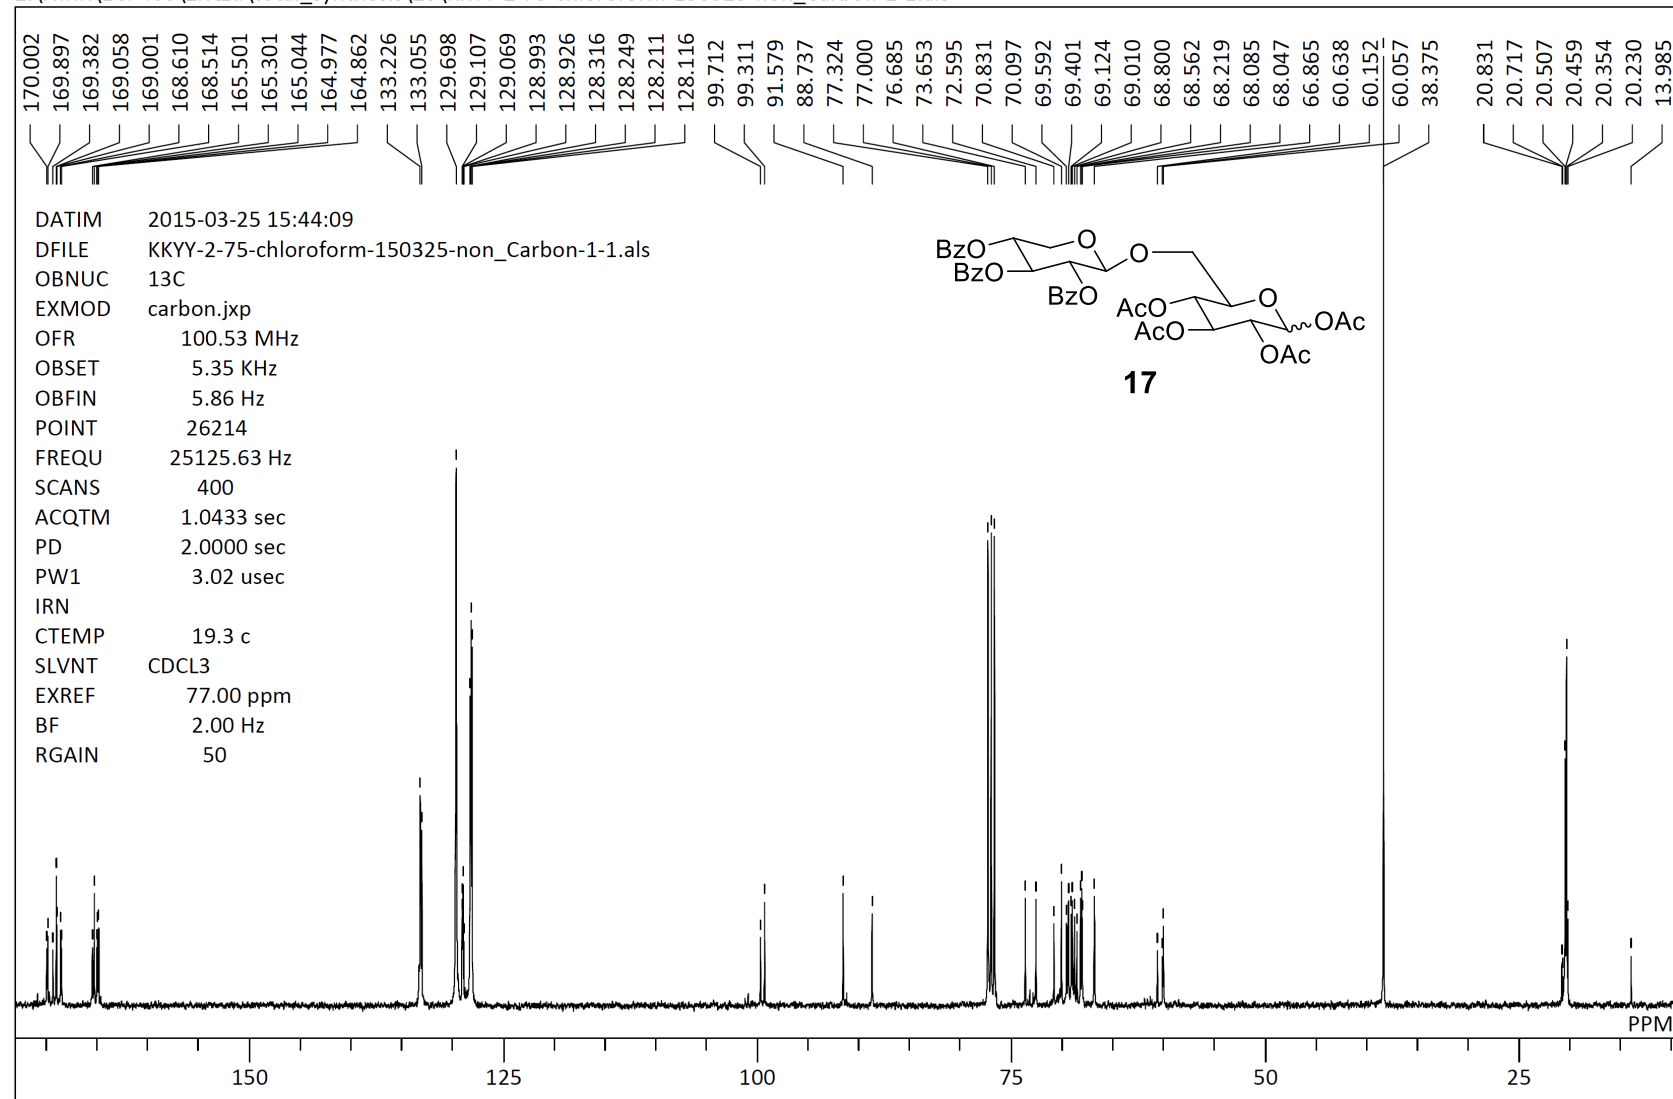



Z:\NMR\ECP400\ŽRĚŮ\total\_synthesis\21\kky-2-36-chloroform-170206\_proton-1-1.als

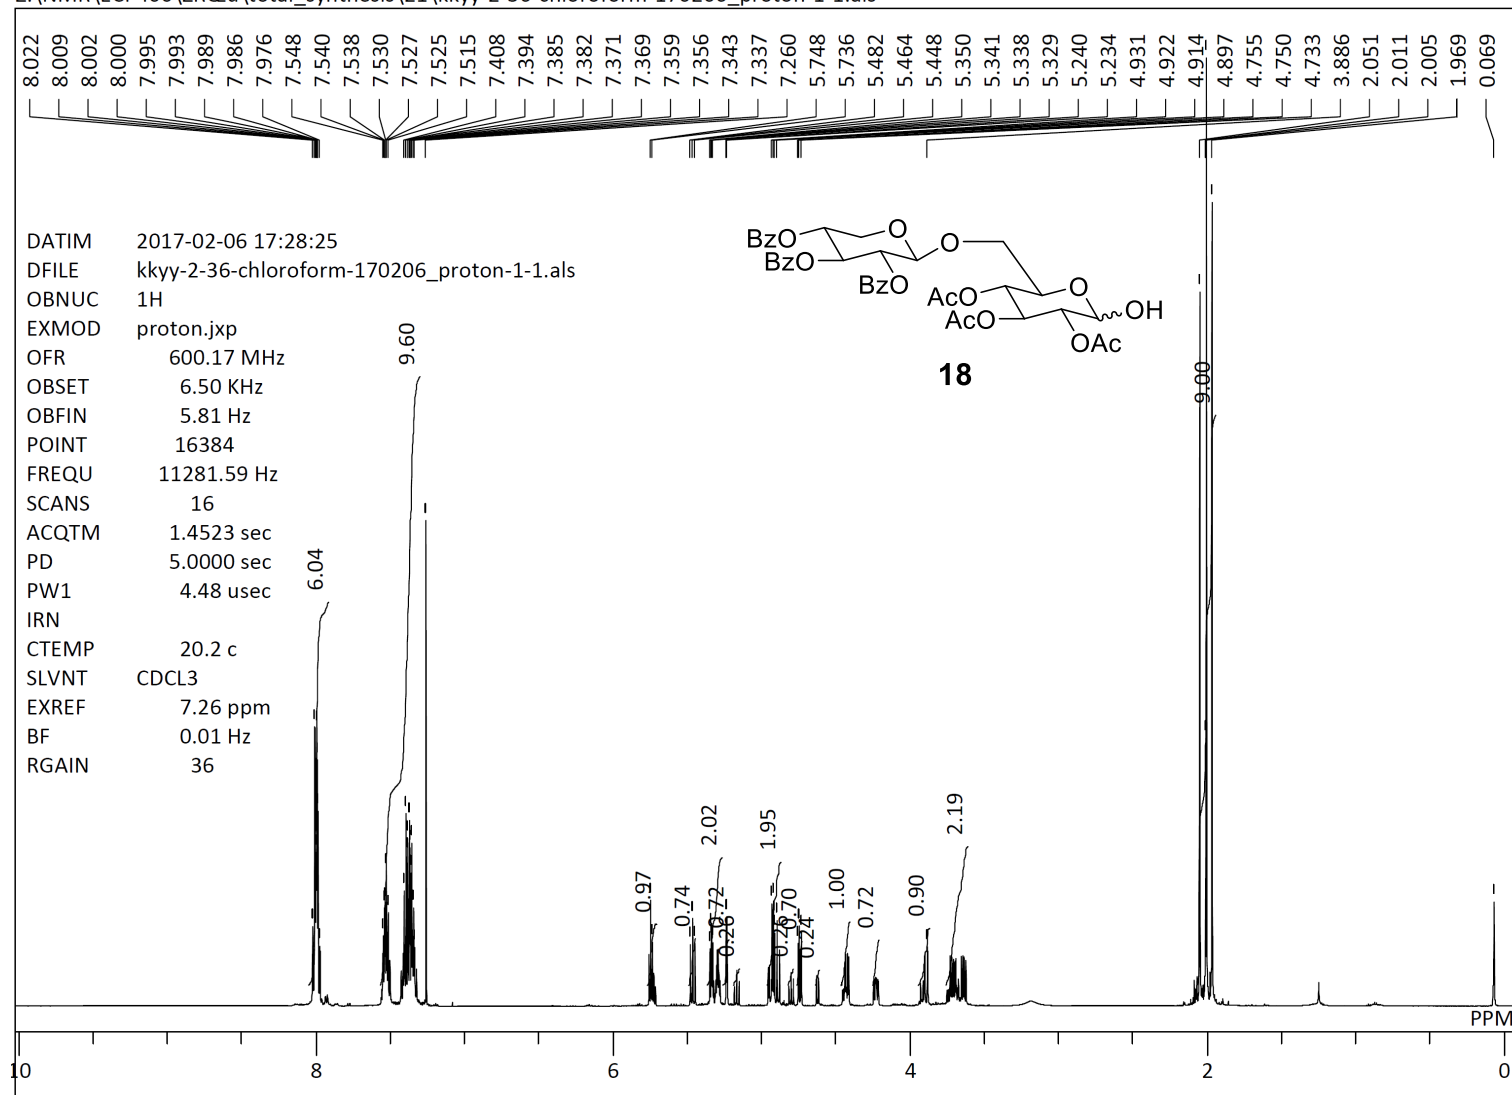

Z:\NMR\ECP400\ŽRCEÛ\total\_synthesis\21\kky-2-36-chloroform-170206\_carbon-1-1.als

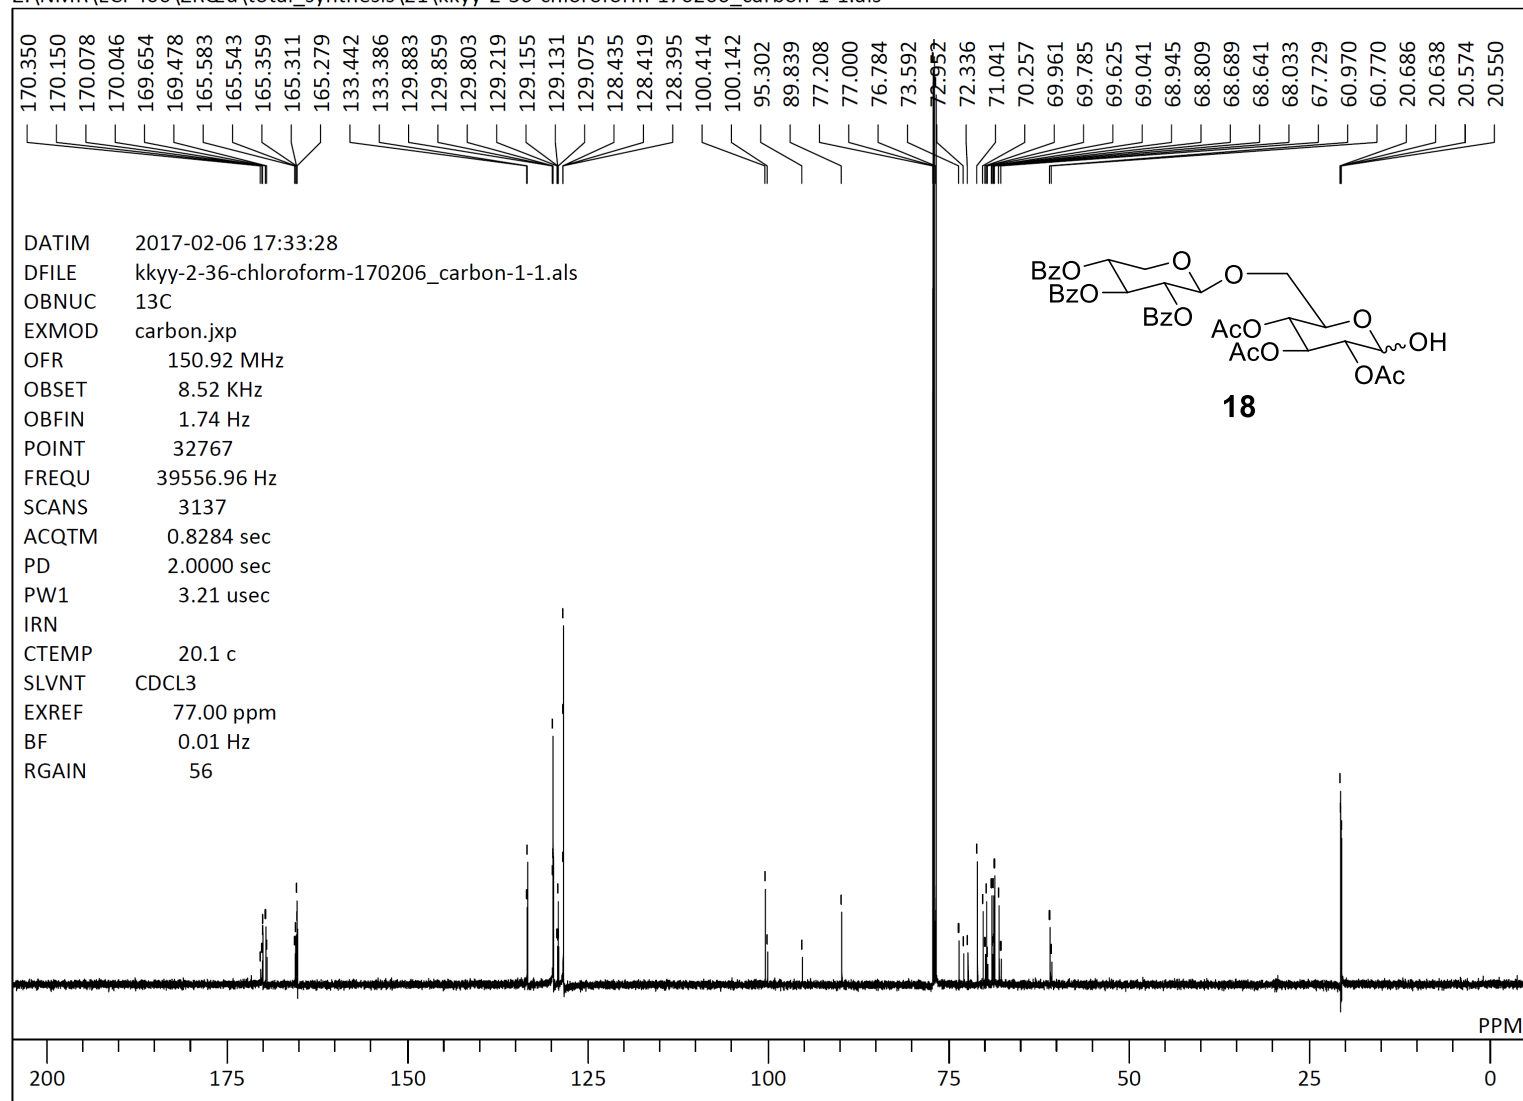

Z:\NMR\ECP400\ŽRĚû\total\_synthesis\24\kkyy-4-98-chloroform-170206\_proton-1-1.als

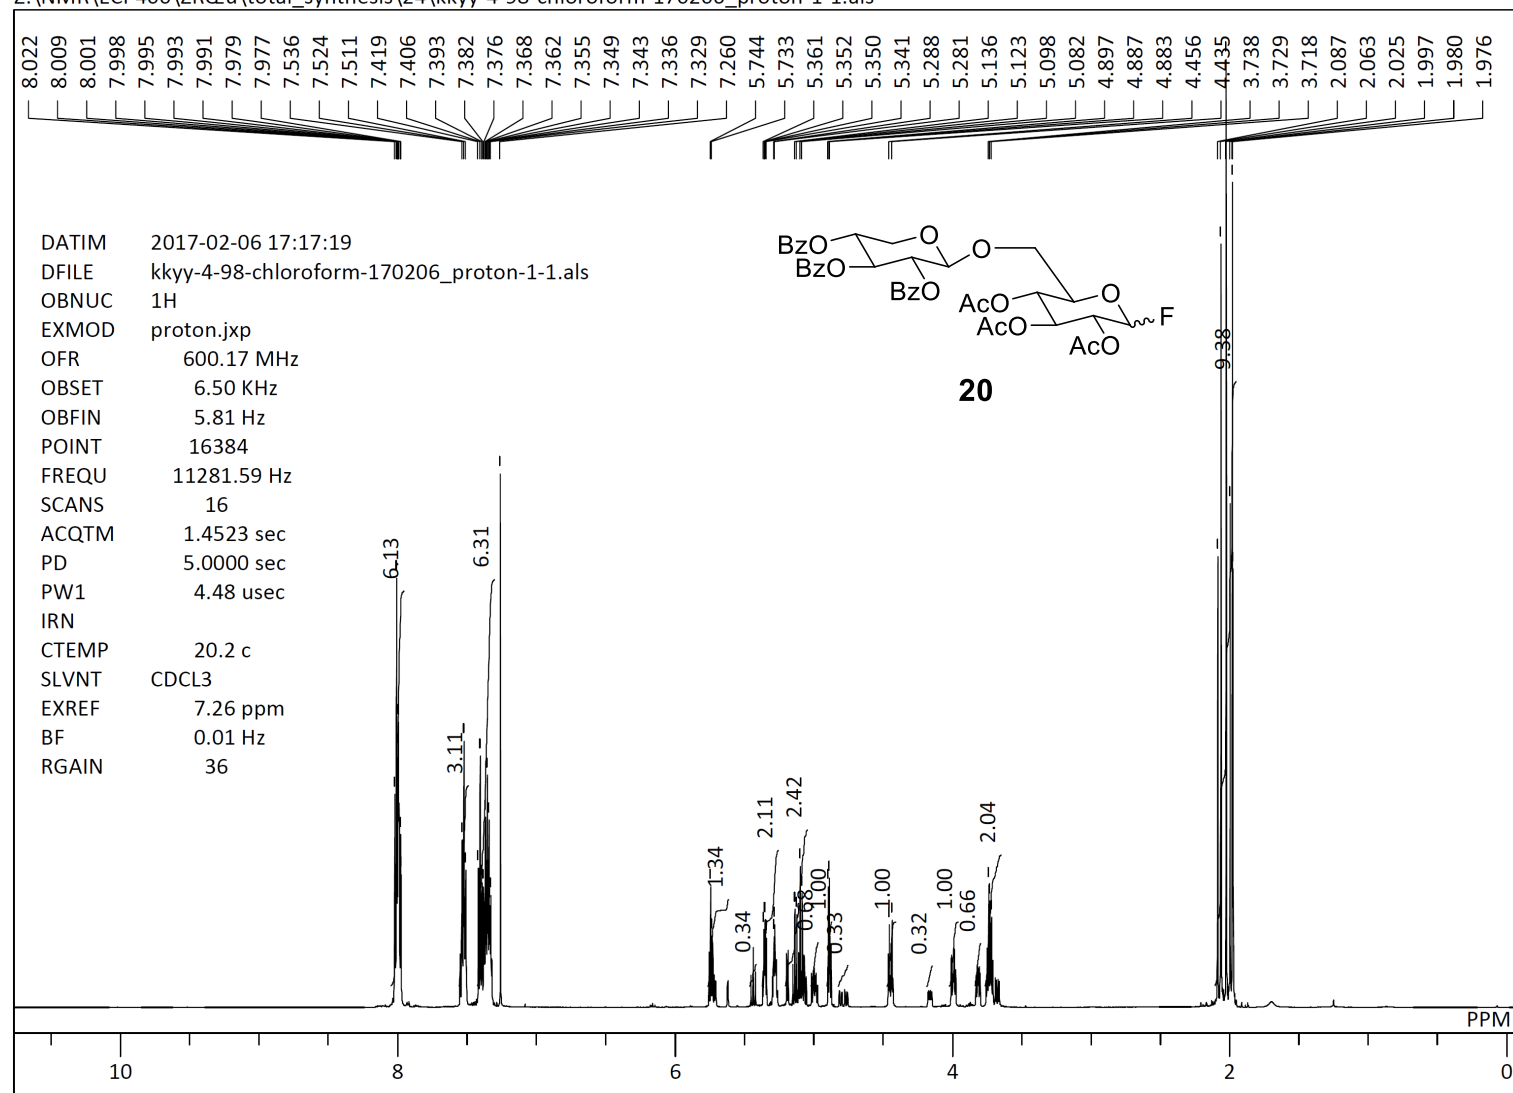

Z:\NMR\ECP400\ŽRCE\total\_synthesis\24\kky-4-98-chloroform-170207\_carbon-1-1.als

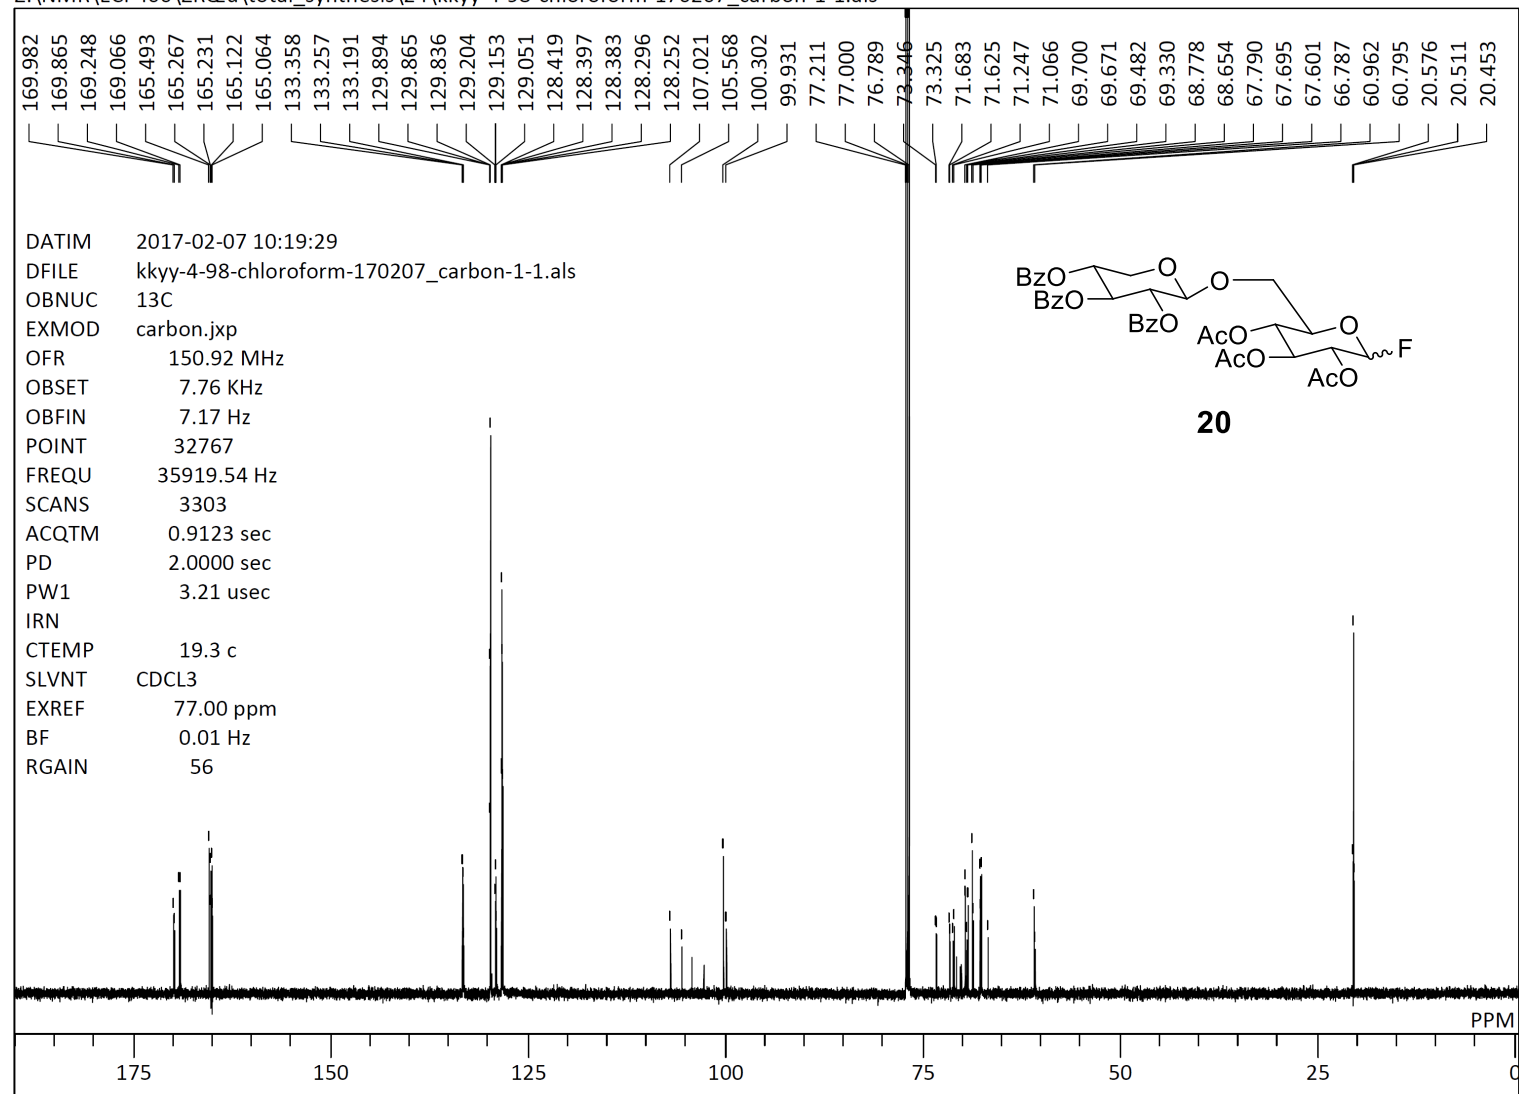

Z:\NMR\ECP400\ŽRĚú\total\_synthesis\22\kky-2-51-chloroform-160126\_proton-1-1.als

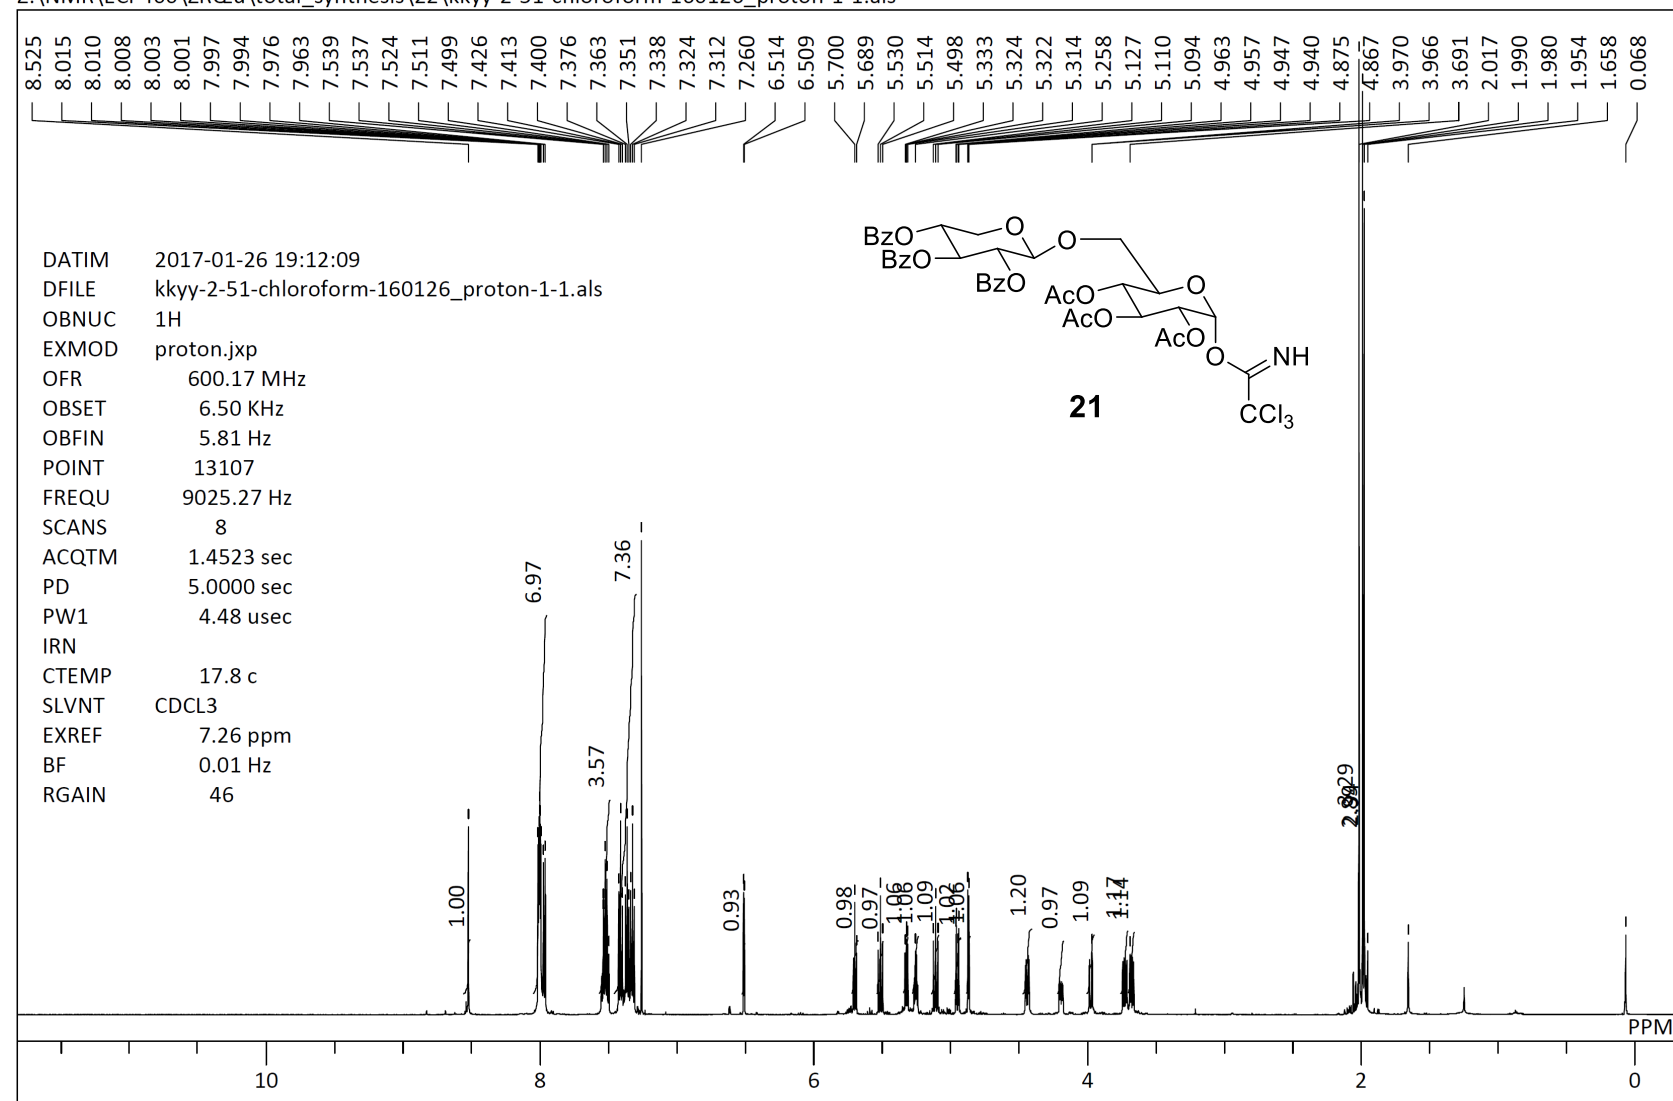

Z:\NMR\ECP400\ŽRĚŮ\total\_synthesis\22\kky-2-51-chloroform-160126\_carbon-1-1.als

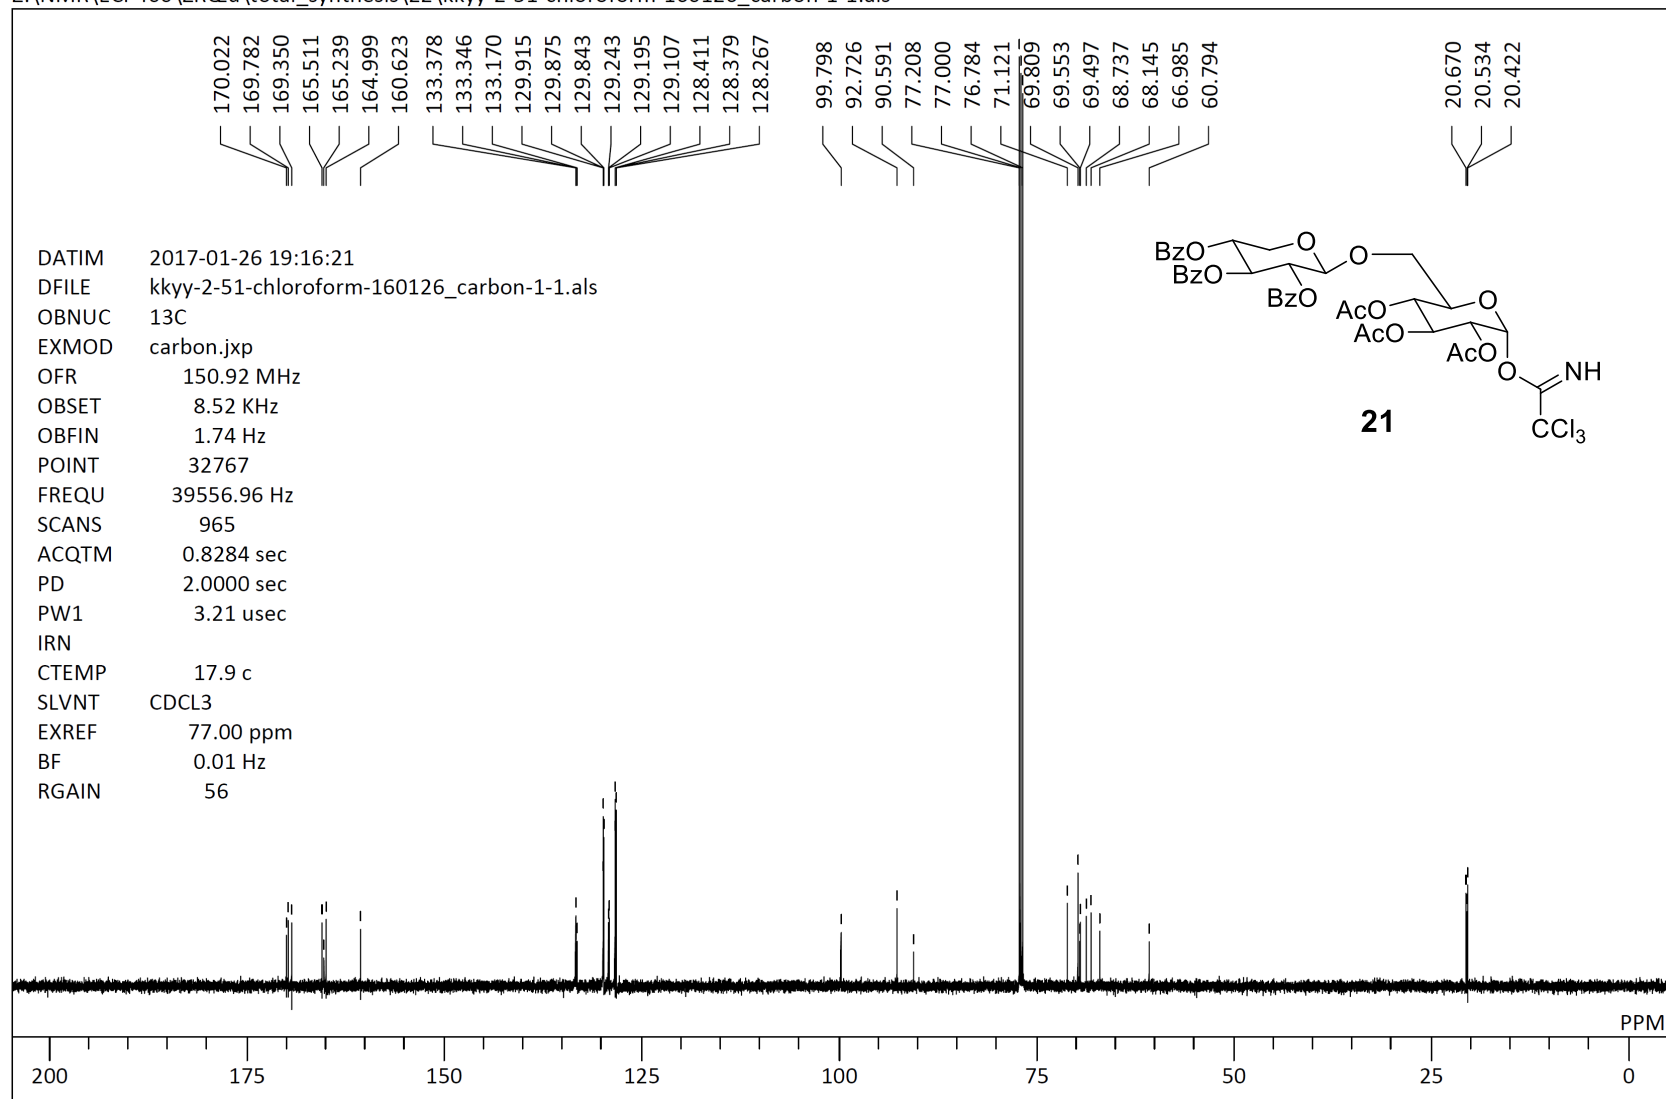

Z:\NMR\ECP400\ZRCU\total\_synthesis\27\kky-5-44-C-2-chloroform-160627-non\_proton-1-1.als

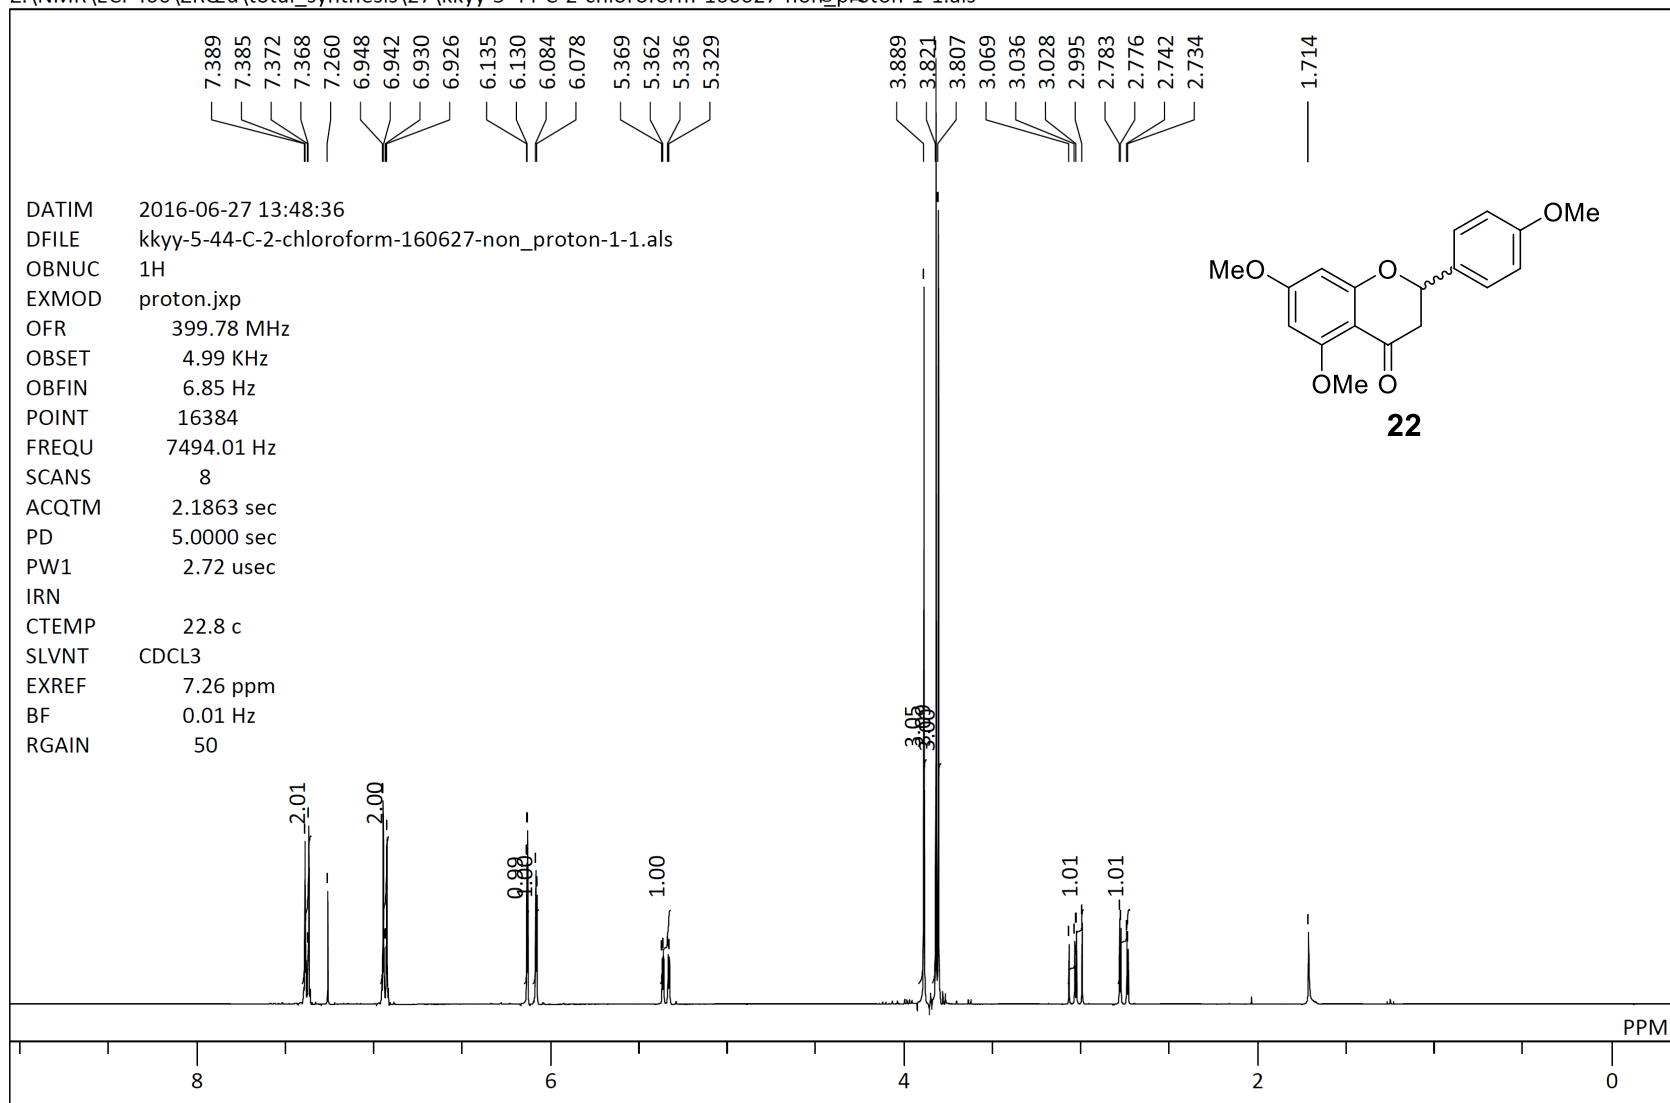

\\Kk-optiplex3020\nmr\ECP400\ZRCU\total\_synthesis\27\kky-4-3-B-chloroform-150512-bcm\_carbon-1-1.als

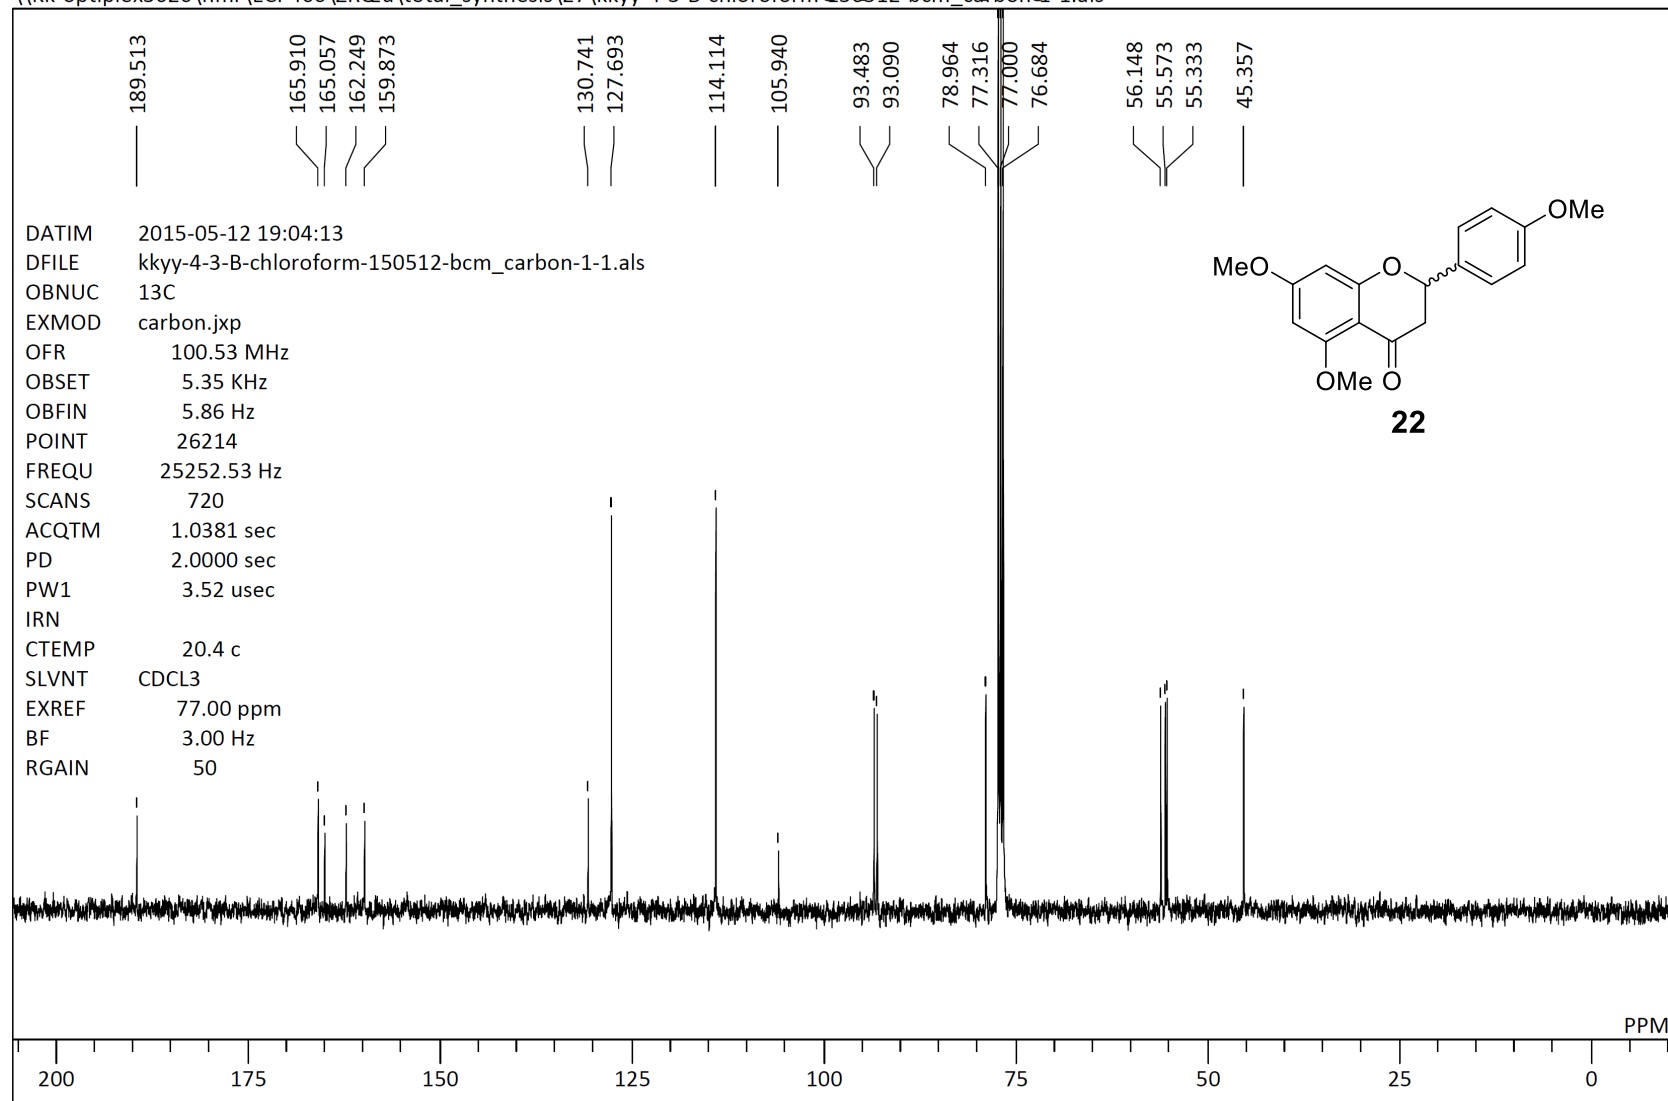



Z:\NMR\ECP400\ZRCU\total\_synthesis\28\kky-5-52-B-chloroform-160709-non\_proton-1-1.als

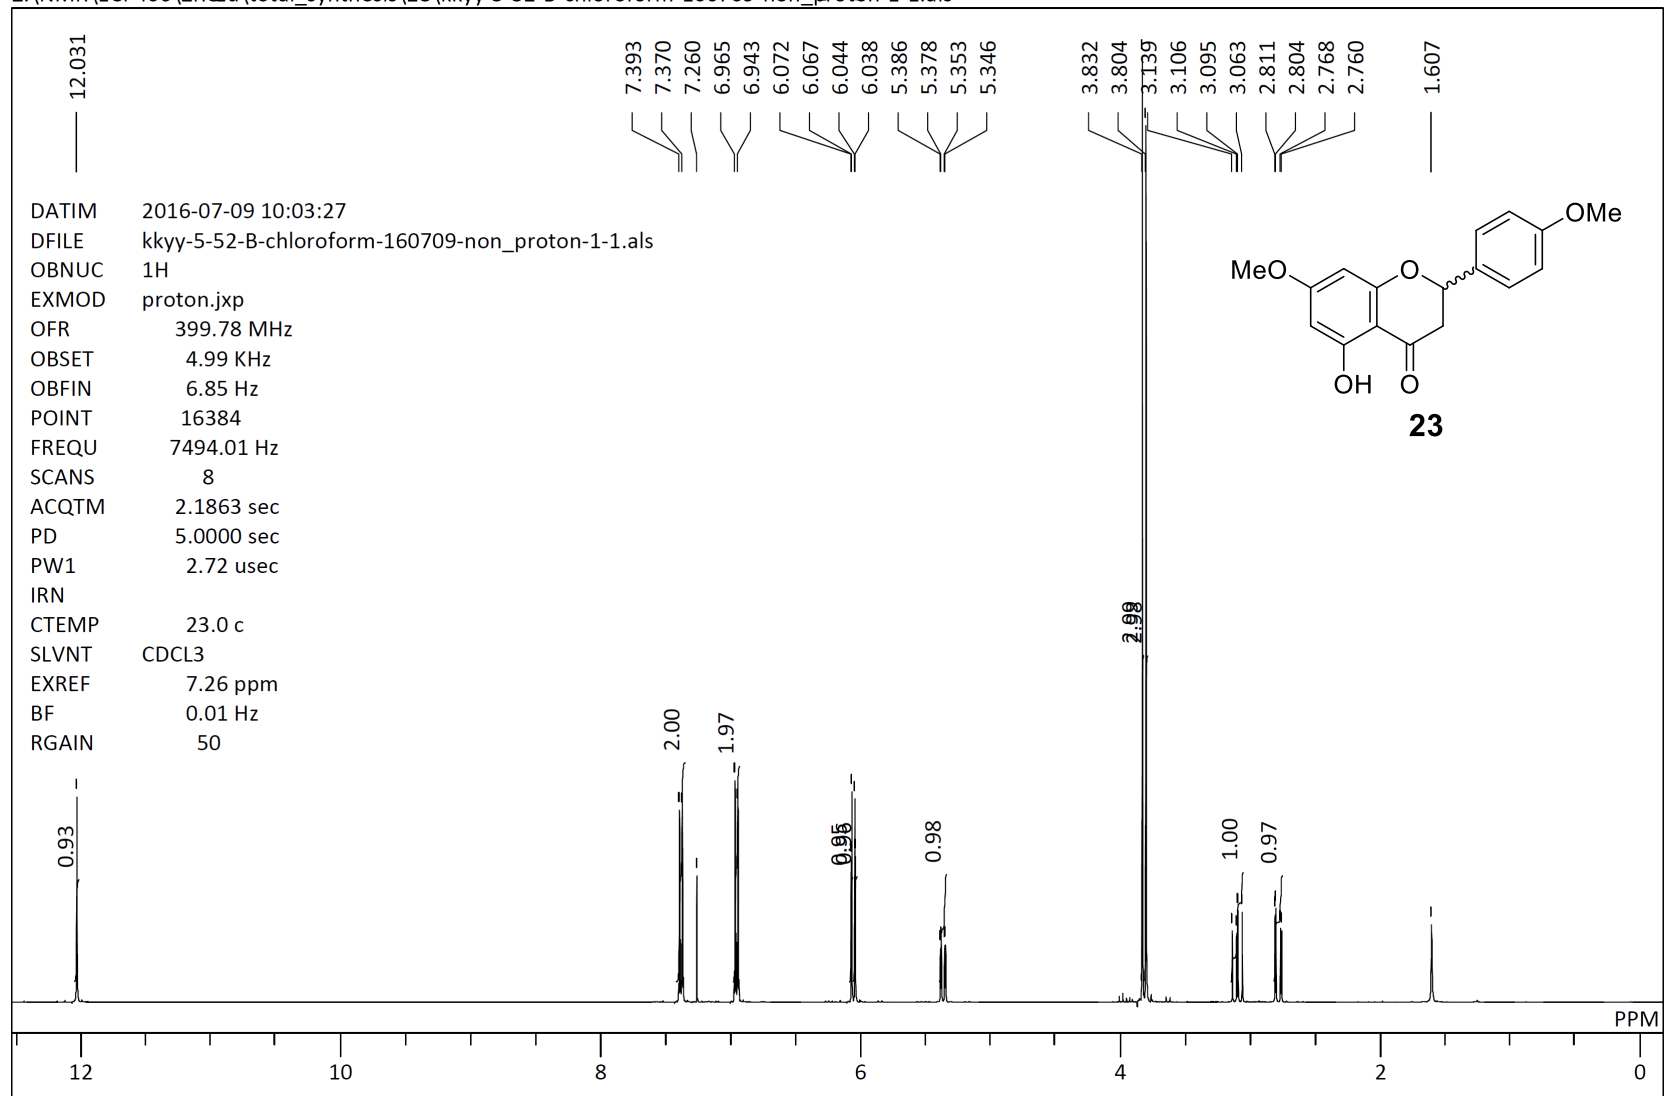

\\Kk-optiplex3020\nmr\ECP400\ZRCU\total\_synthesis\28\kky-4-9-A-chloroform-150522\_carbon-1-1.als  
 single pulse decoupled gated NOE

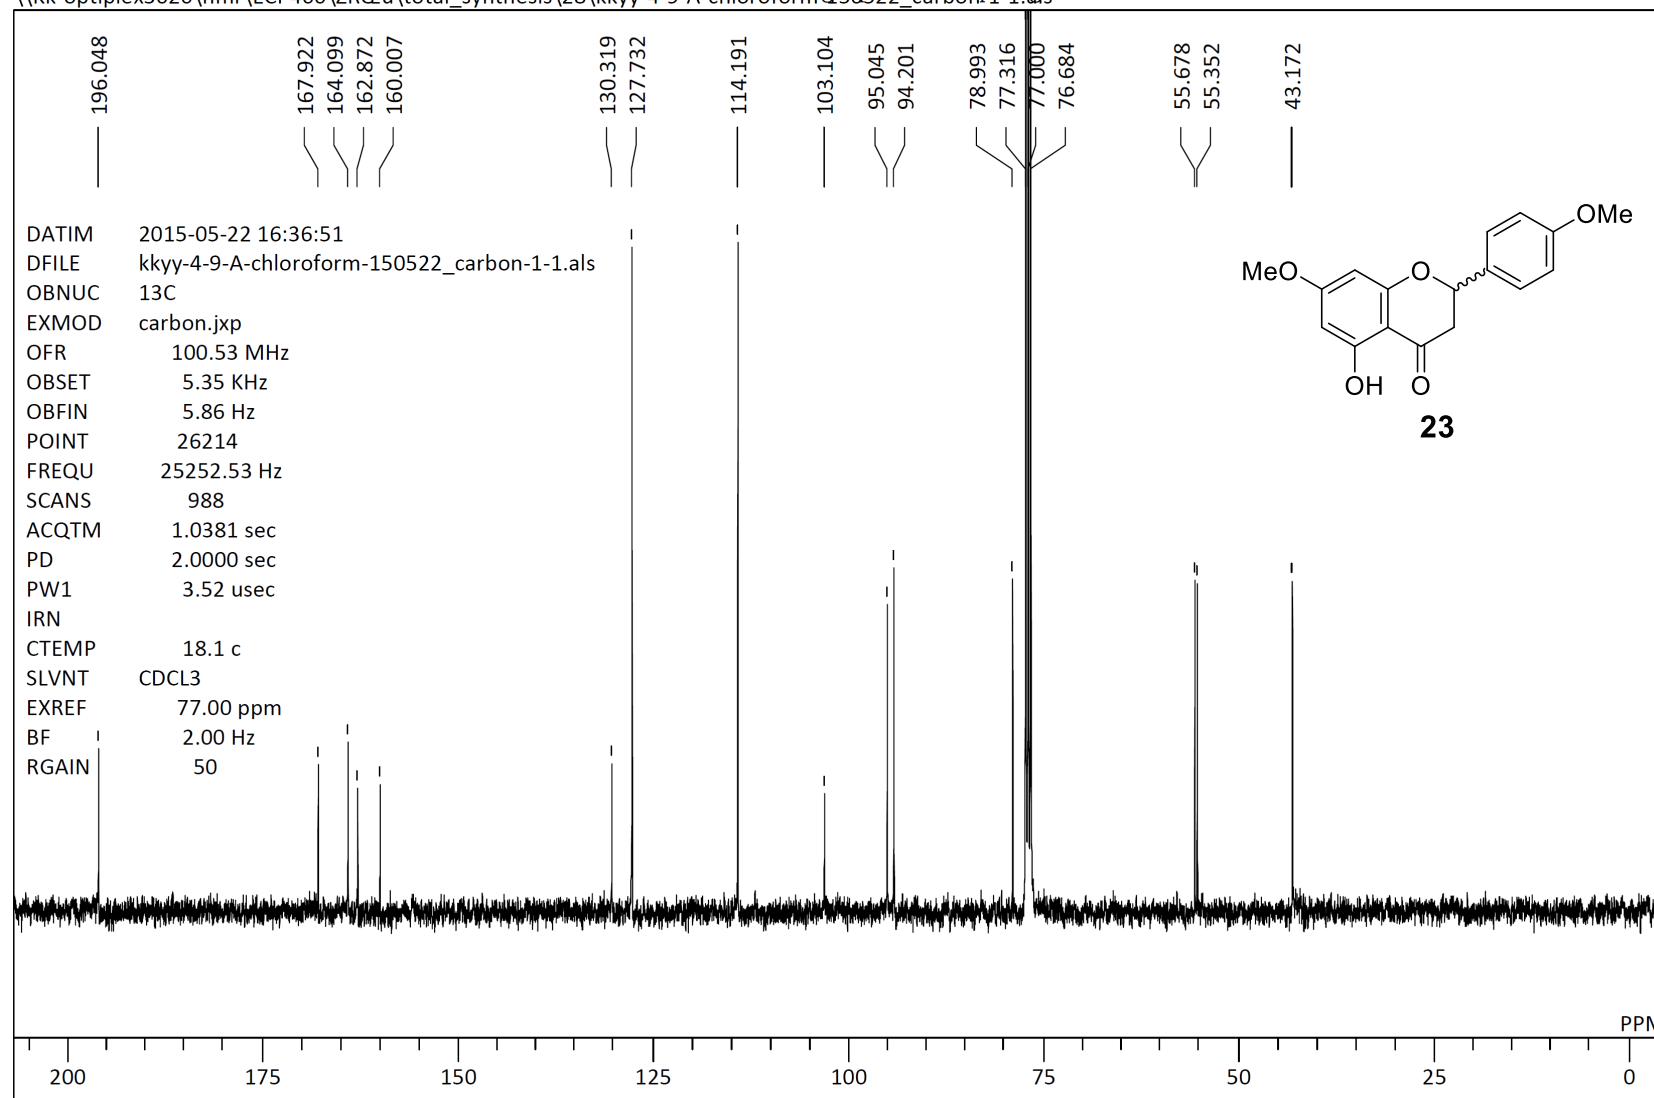

Z:\NMR\ECP400\ZRCU\total\_synthesis\29\kky-5-53-C-chloroform-160716\_single\_pulse

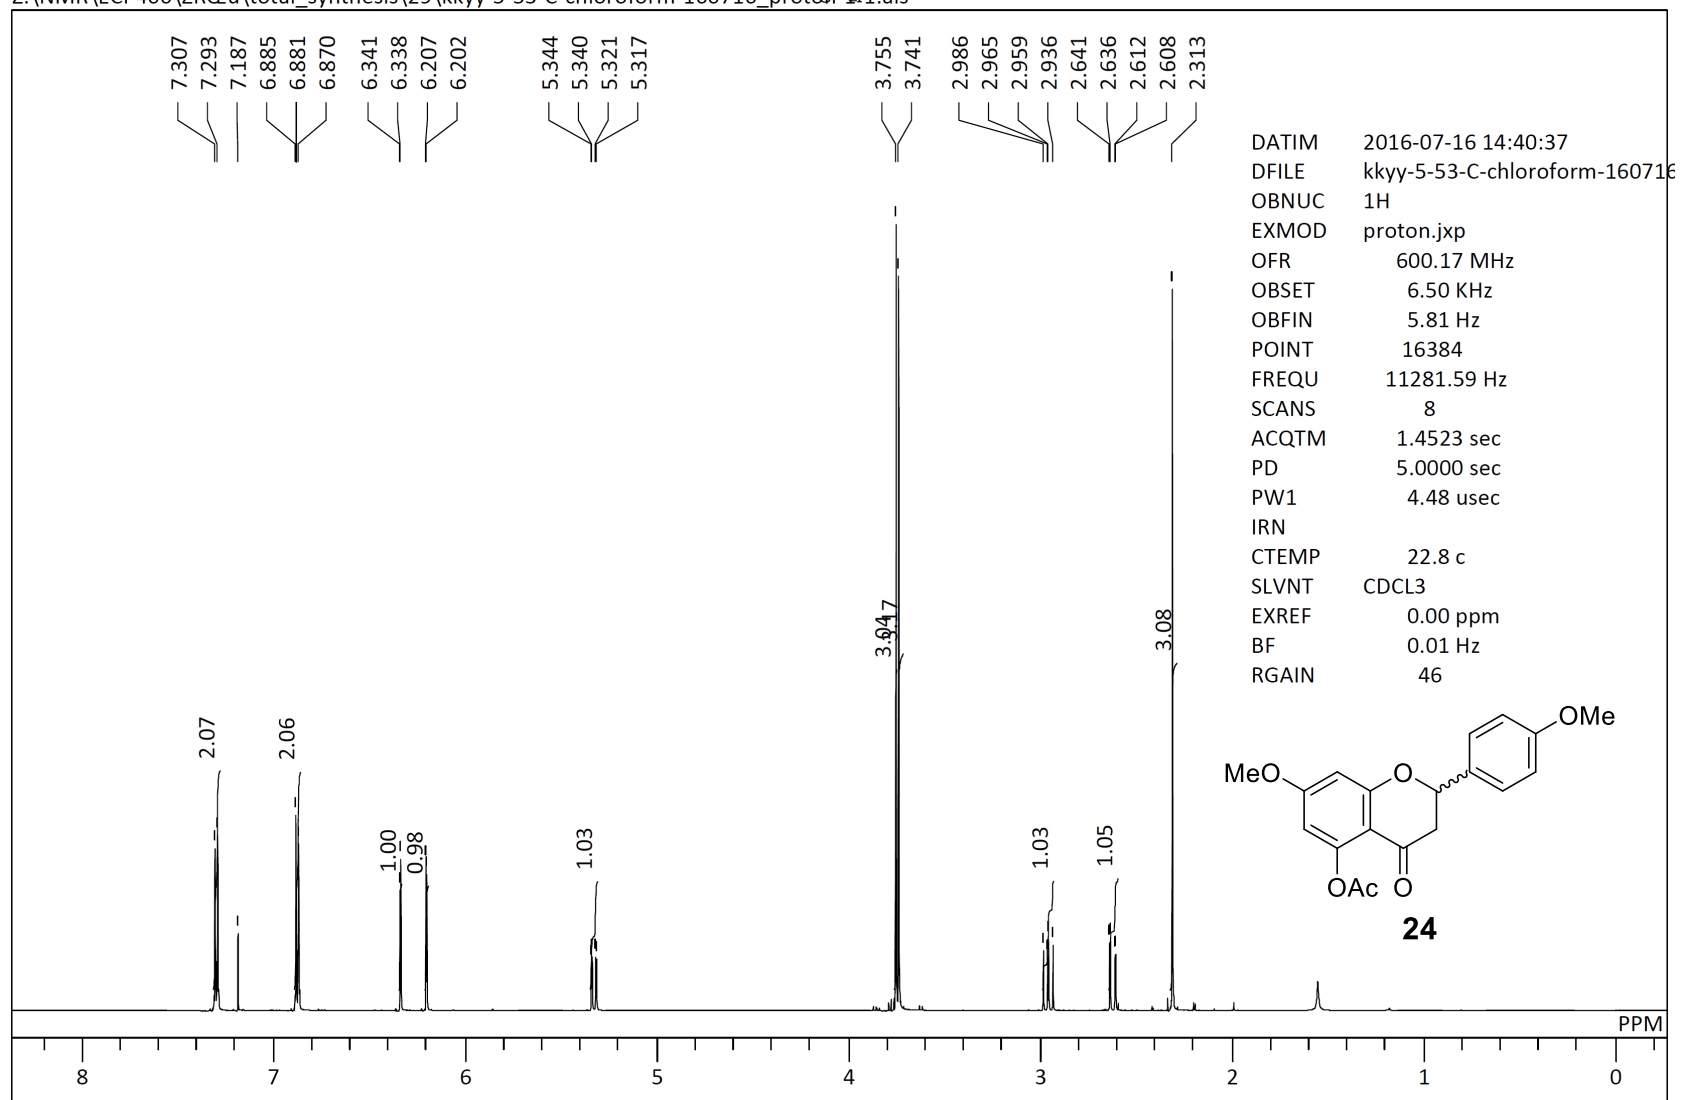

Z:\NMR\ECP400\ZRCU\total\_synthesis\29\kky-5-53-C-chloroform-160716\_carbon-1-1.als  
 single pulse decoupled gated NOE

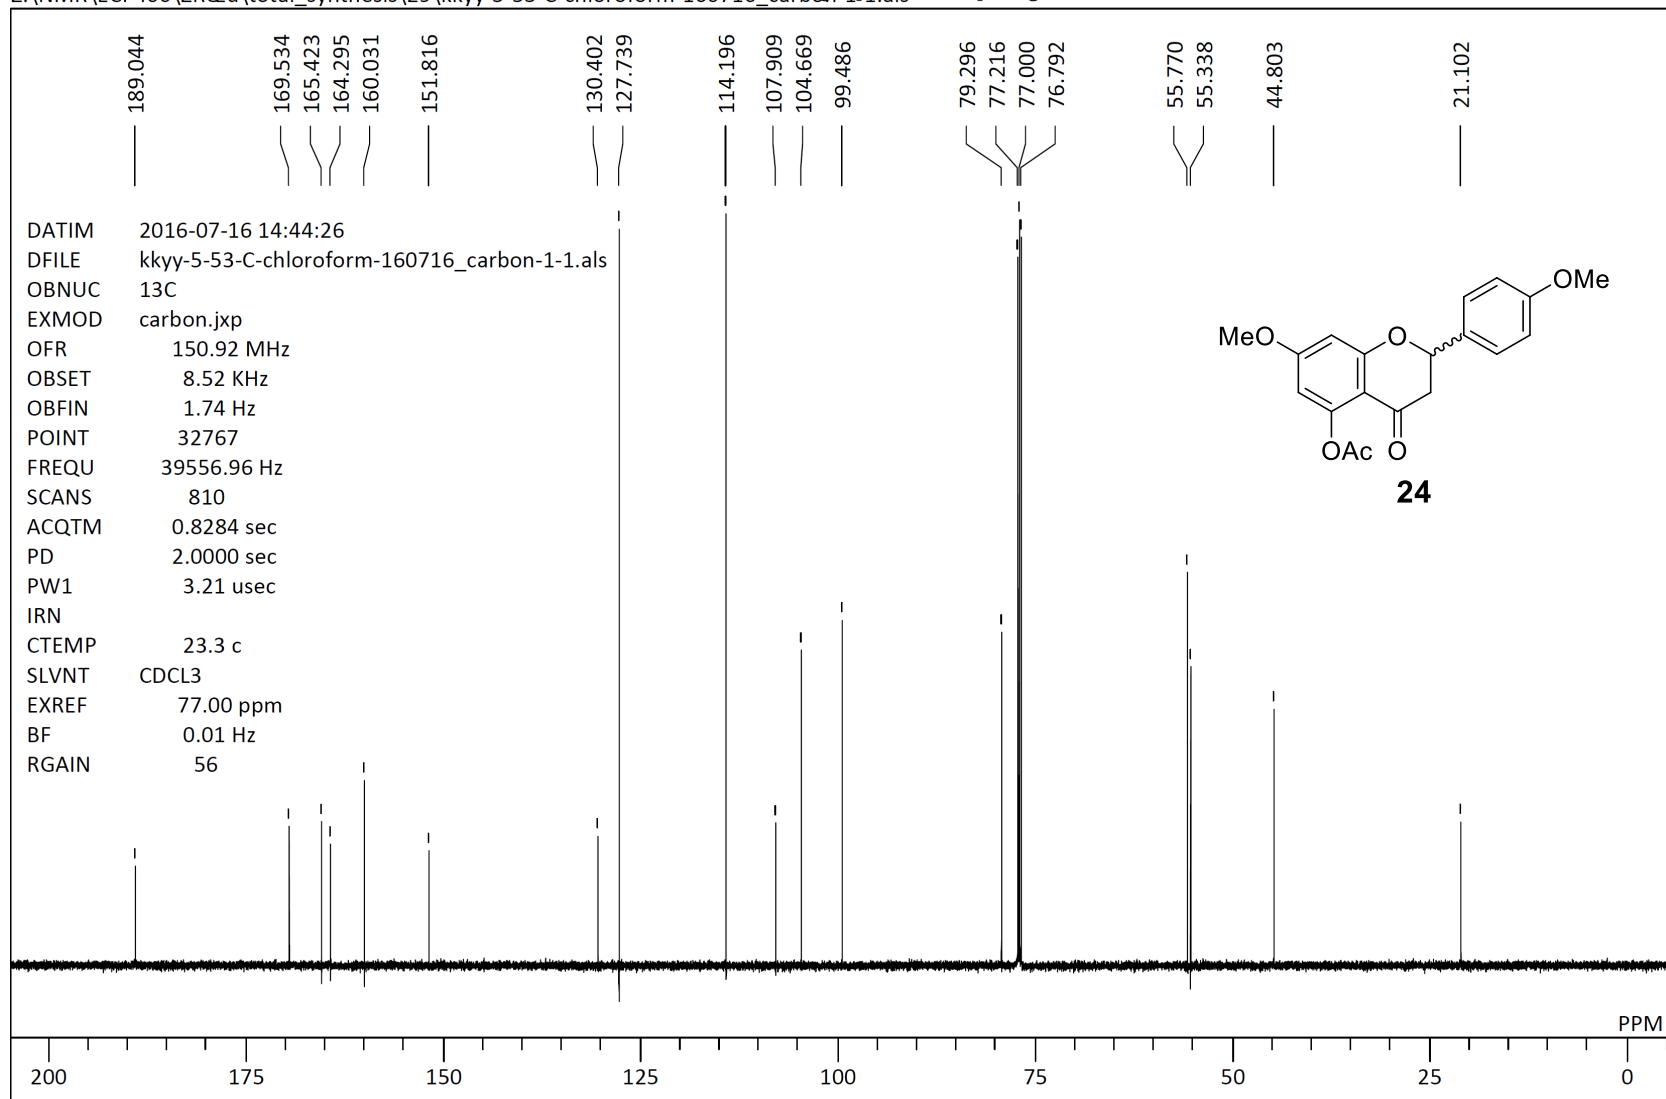

Z:\NMR\ECP400\ZRCU\total\_synthesis\30\kky-5-54-B-chloroform-160721-non\_proton-1-1.als

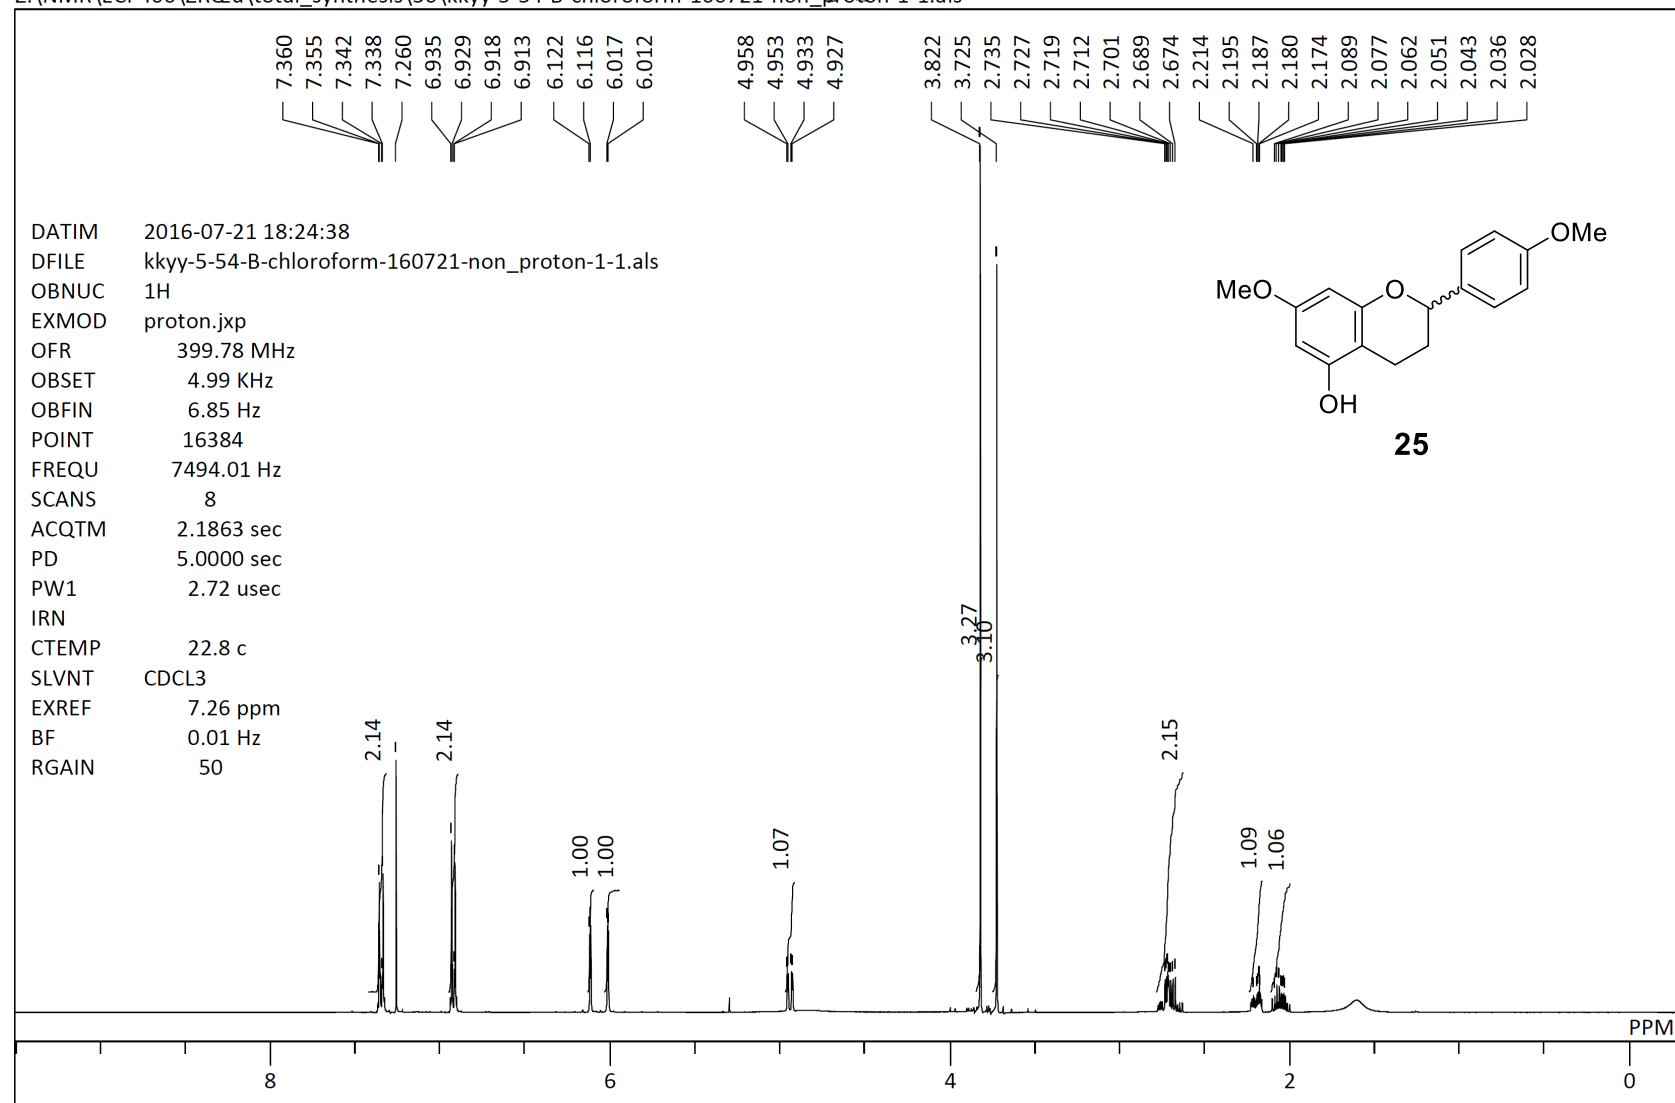

\\Kk-optiplex3020\nmr\ECP400\ZRCU\total\_synthesis\30\kky-4-28-chloroform-150615\_carbon-1-1.als  
single pulse decoupled gated NOE

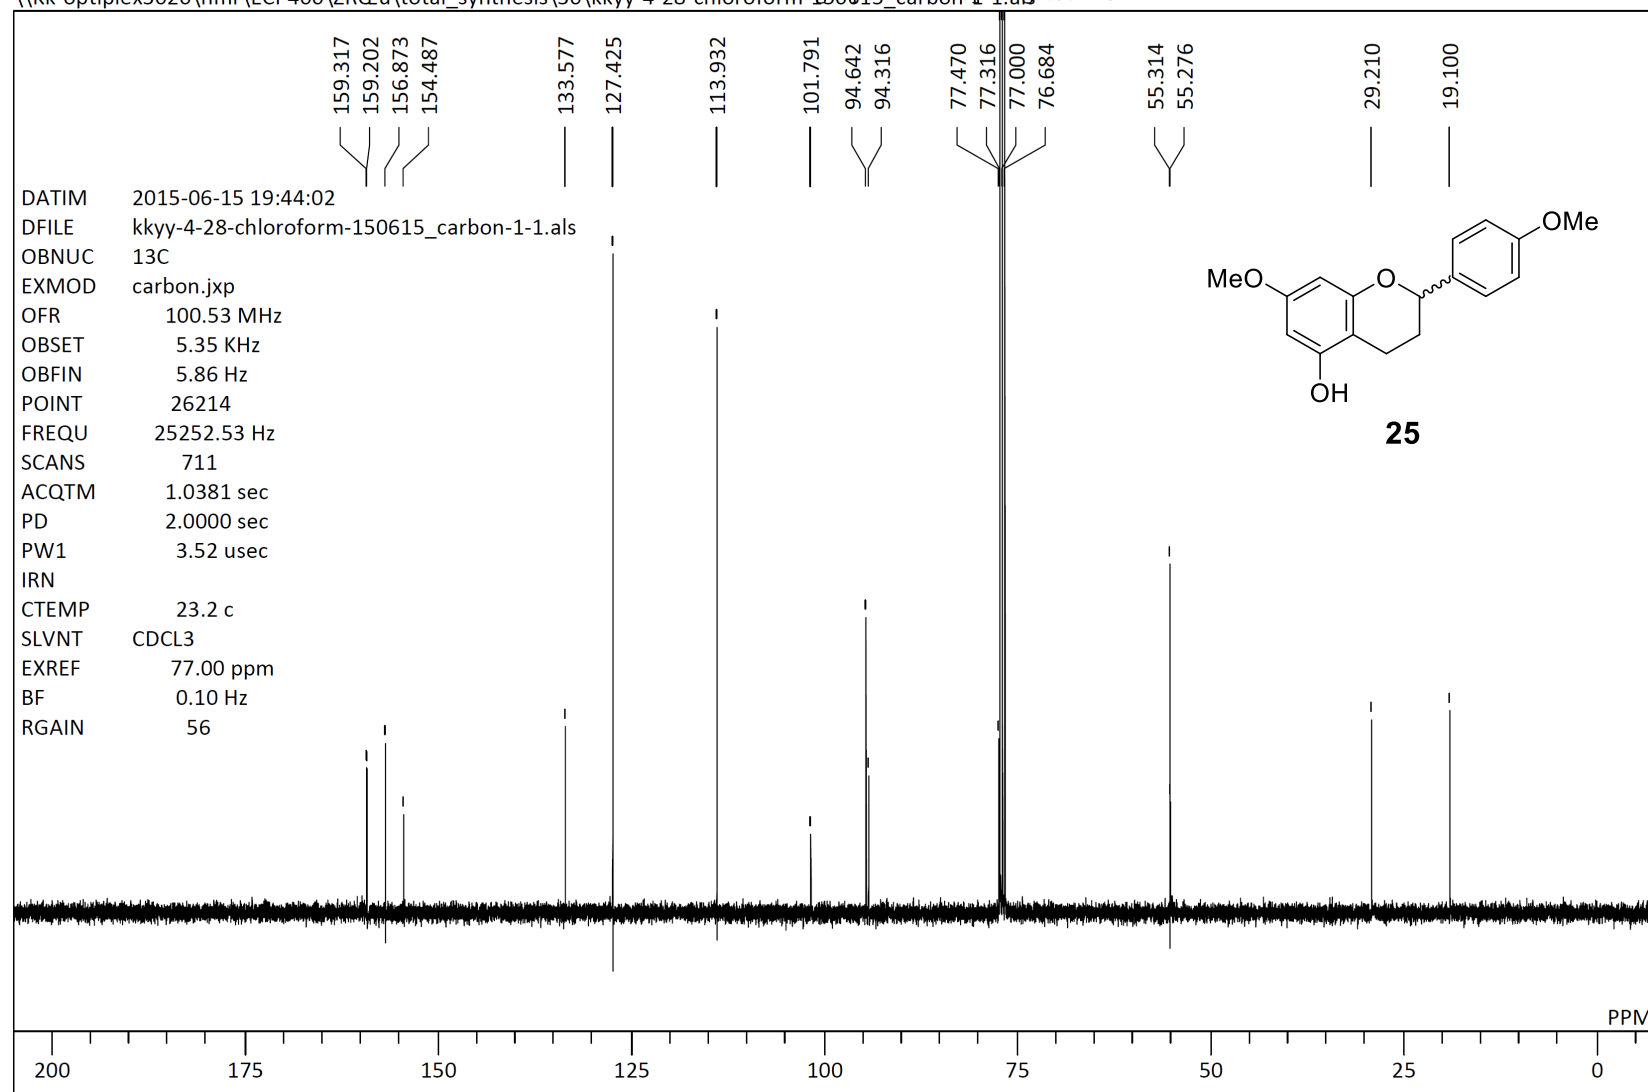

Z:\NMR\ECP400\ŽRCEŮ\total\_synthesis\31\kky-4-99-chloroform-170131\_proton-1-1.als

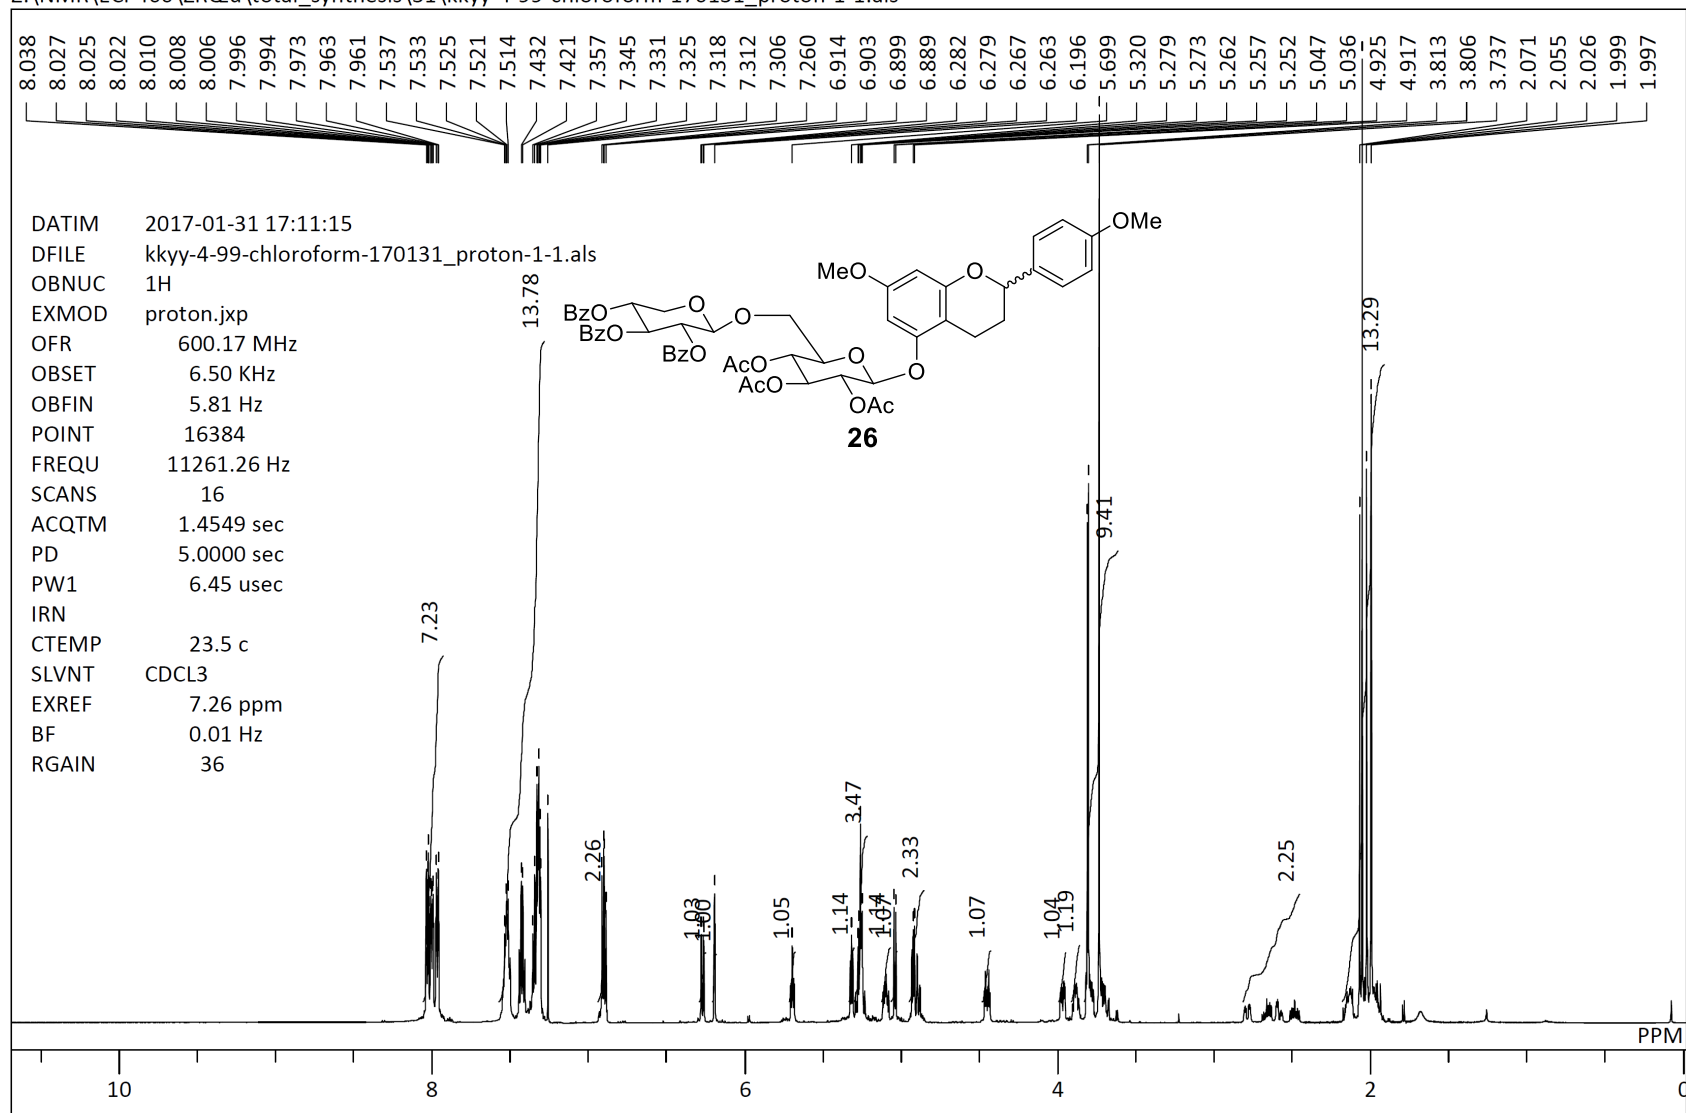

Z:\NMR\ECP400\ŽRCĚ\total\_synthesis\31\kky-4-99-chloroform-170201\_carbon-1-1.als

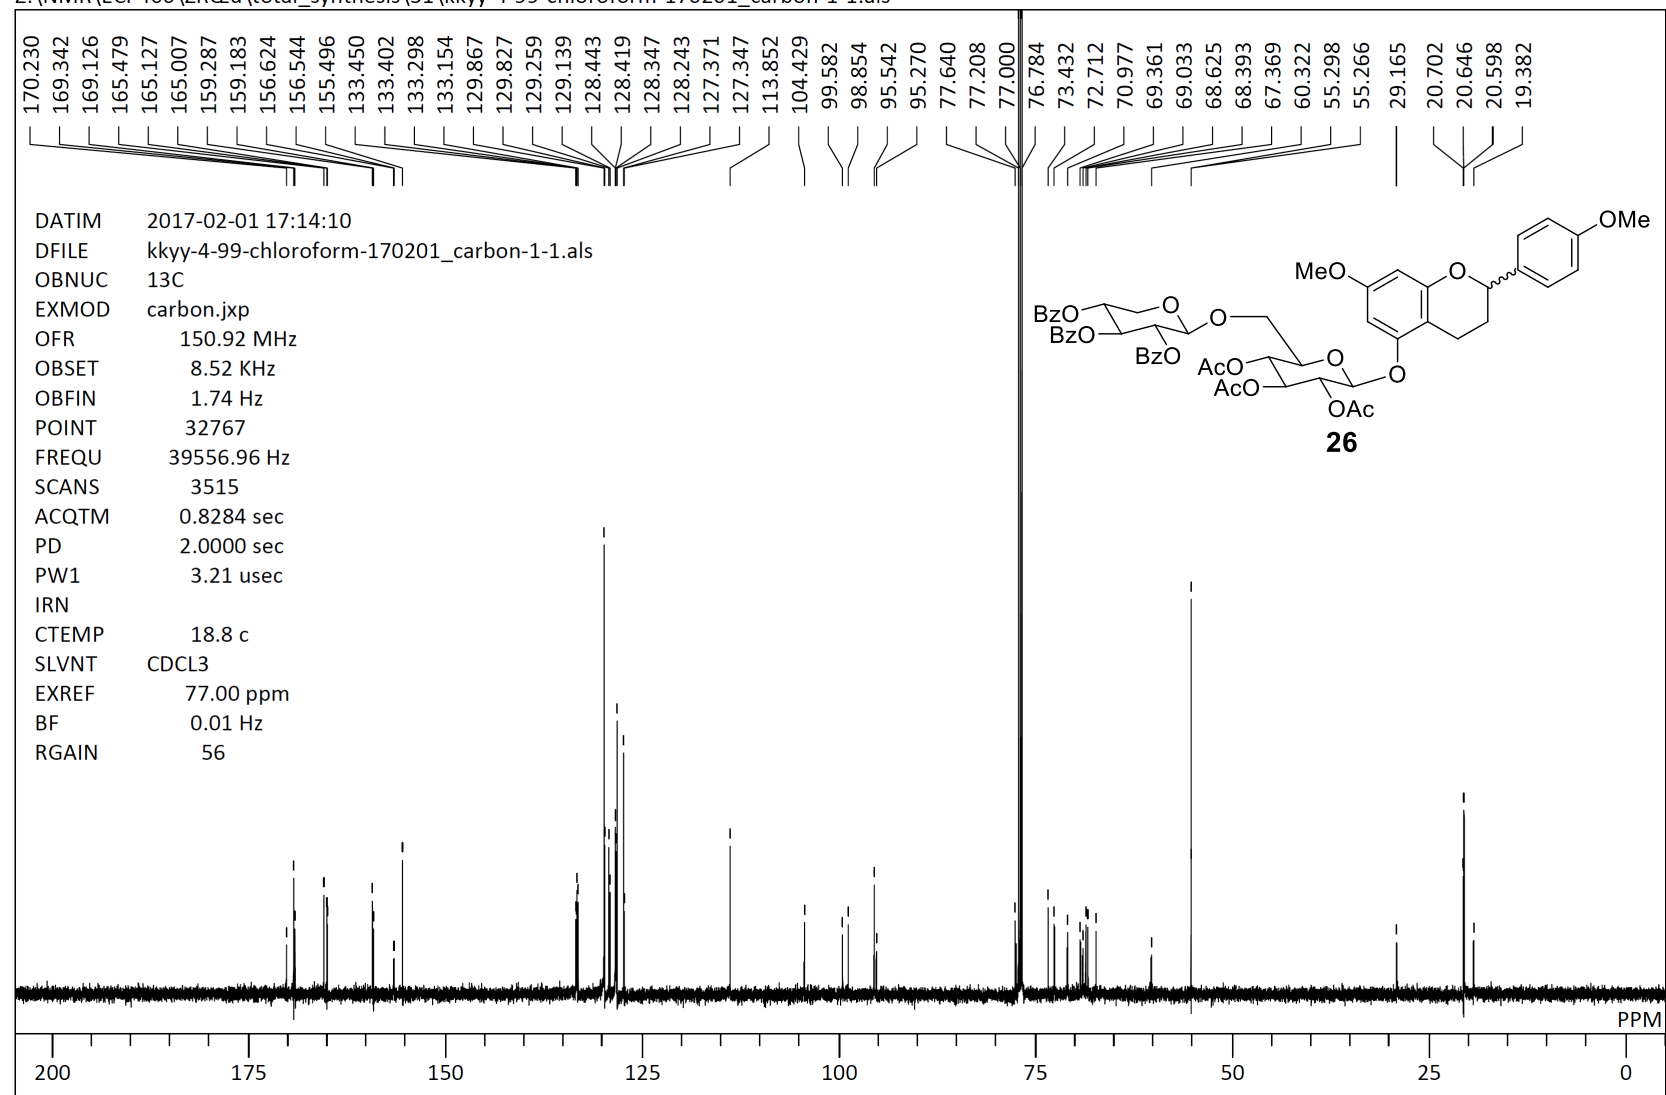



Z:\NMR\ECP400\2017-02-14\total\_synthesis\23\kky-5-37-A-2-chloroform-170214\_proton-1-1.als

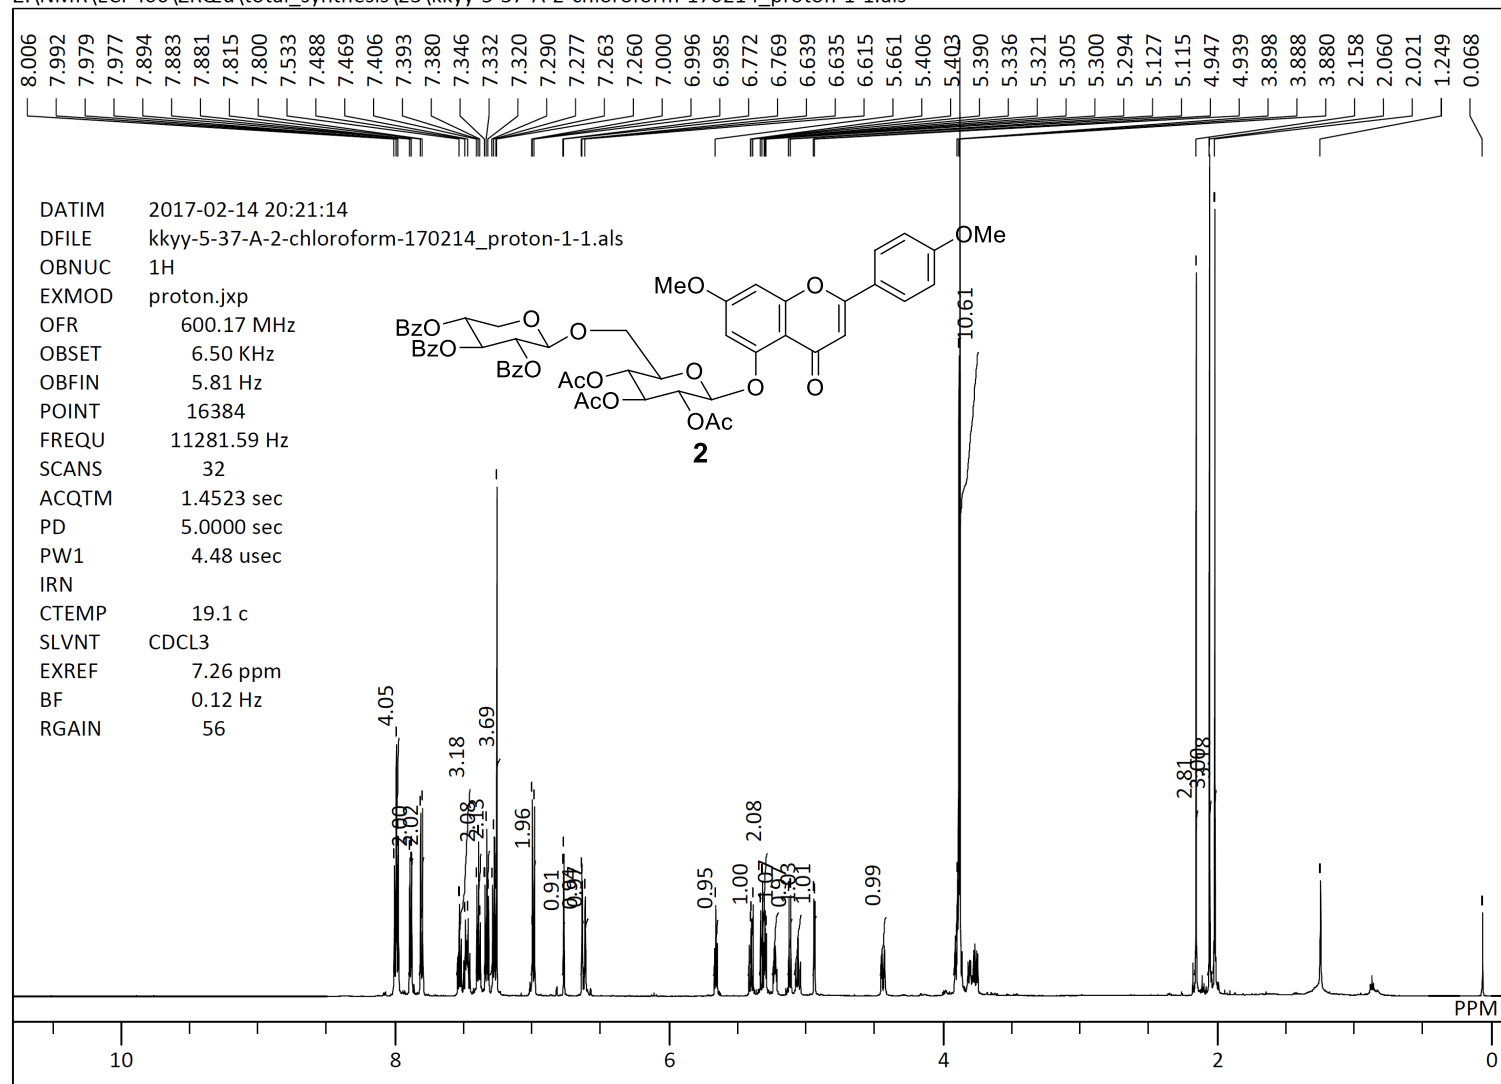

Z:\NMR\ECP400\ŽRCE\total\_synthesis\23\kky-5-37-A-2-chloroform-170214\_carbon-1-1.als

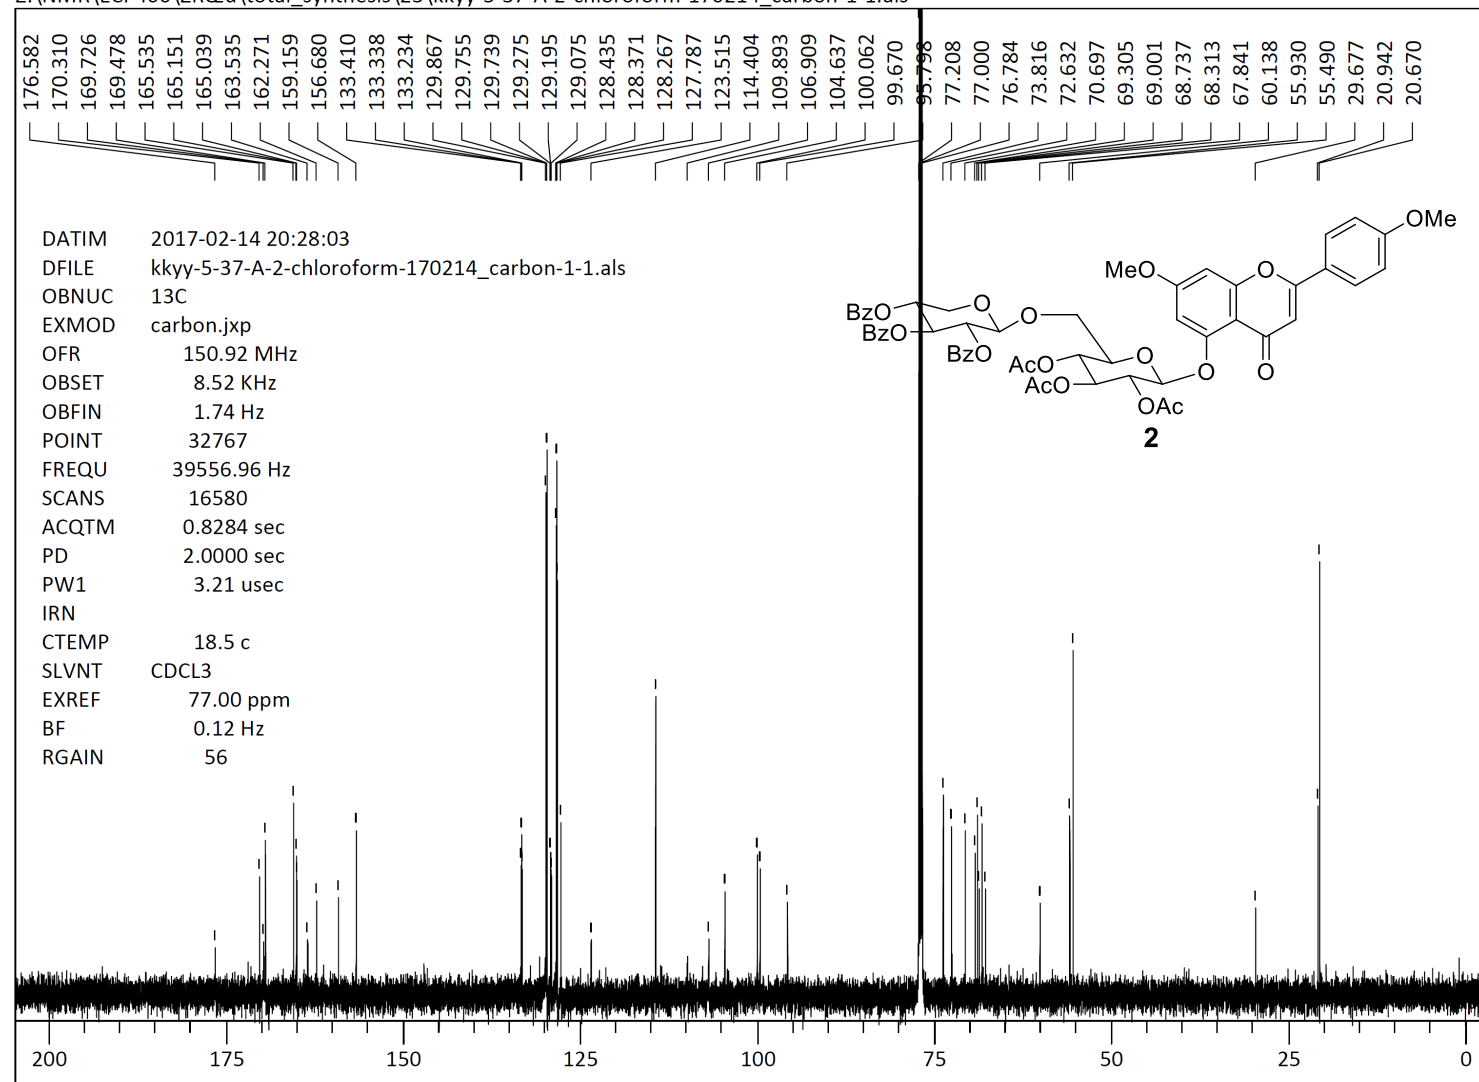

DATIM 2015-10-10 18:31:17  
DFILE kkyy-4-102-DMSO-151010\_proton-1-1.als  
OBNUC 1H  
EXMOD proton.jxp  
OFR 600.17 MHz  
OBSET 6.50 KHz  
OBFIN 5.81 Hz  
POINT 13107  
FREQU 9009.01 Hz  
SCANS 64  
ACQTM 1.4549 sec  
PD 5.0000 sec  
PW1 5.97 usec  
IRN  
CTEMP 19.9 c  
SLVNT DMSO  
EXREF 2.49 ppm  
BF 2.00 Hz  
RGAIN 48

Chemical structure of compound **1**:  
COC1=CC=C(C=C1)c2cc(oc3c2c(oc4ccc(OC)cc4)cc3O)[C@H]5O[C@@H](CO[C@H]6[C@@H](O)[C@H](O)[C@H]6O)[C@H](O)[C@H]5O

Peak list (PPM):  
8.047, 8.033, 7.113, 7.098, 7.064, 6.867, 6.798, 5.572, 5.203, 5.194, 5.184, 4.961, 4.898, 4.890, 4.793, 4.780, 4.183, 4.170, 3.974, 3.956, 3.892, 3.848, 3.684, 3.666, 3.642, 3.563, 3.337, 3.201, 3.084, 3.028, 3.011, 2.971, 2.490, 1.892

PPM

\\Kk-optiplex3020\nmr\ECP400\ZRCU\total\_synthesis\1\kky-4-102-DMSO-D2O-151010\_carbon-1-1.asg

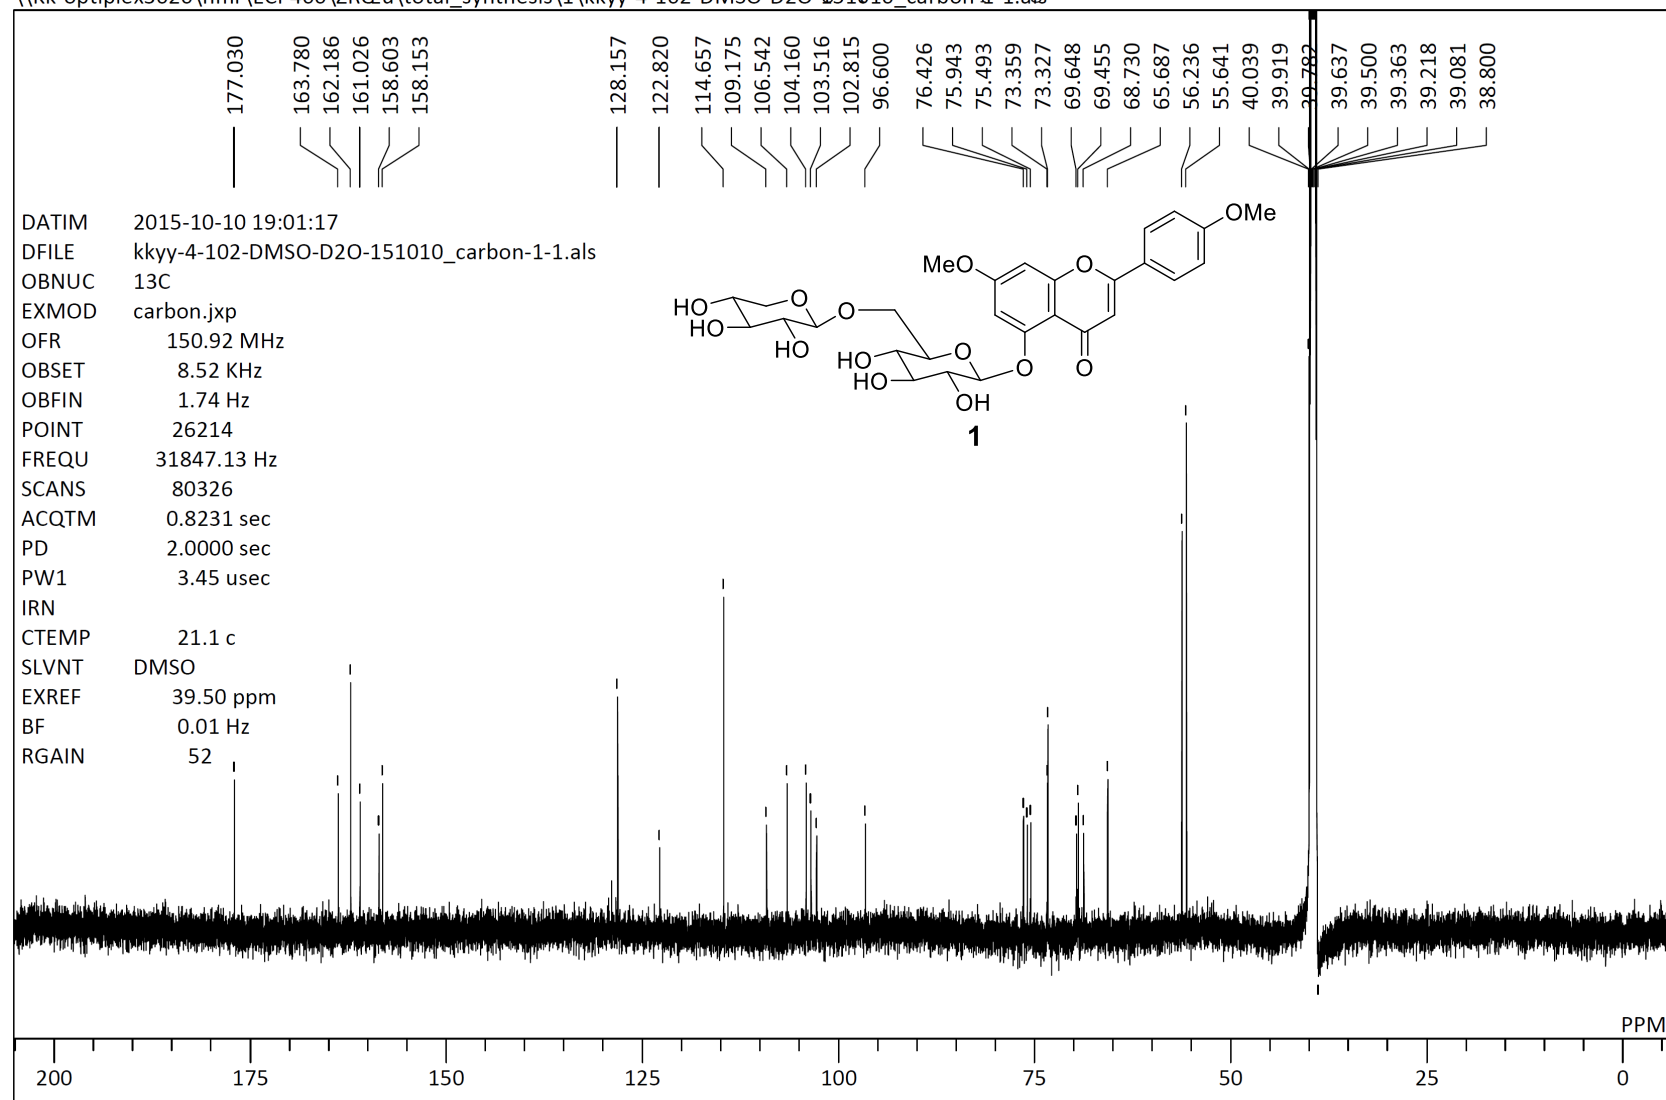

Supplement: c7ob01004d1.pdf [file c7ob01004d1.pdf]
